# Supplementary material for: Beyond the ‘dyad’: a qualitative re-evaluation of the changing clinical consultation
Source: PubMed Central journal article supplement (PMC4179418; doi:10.1136/bmjopen-2014-006017), 2014-09-29
Supplement: bmjopen-2014-006017.draft_revisions.pdf [file bmjopen-2014-006017.draft_revisions.pdf]

# BMJ Open

## Beyond the 'dyad': A qualitative re-evaluation of the changing clinical consultation

|                                 |                                                                                                                                                                                                                                                                                                                                                                                                                      |
|---------------------------------|----------------------------------------------------------------------------------------------------------------------------------------------------------------------------------------------------------------------------------------------------------------------------------------------------------------------------------------------------------------------------------------------------------------------|
| Journal:                        | <i>BMJ Open</i>                                                                                                                                                                                                                                                                                                                                                                                                      |
| Manuscript ID:                  | bmjopen-2014-006017                                                                                                                                                                                                                                                                                                                                                                                                  |
| Article Type:                   | Research                                                                                                                                                                                                                                                                                                                                                                                                             |
| Date Submitted by the Author:   | 03-Jul-2014                                                                                                                                                                                                                                                                                                                                                                                                          |
| Complete List of Authors:       | Swinglehurst, Deborah; Barts and The London School of Medicine and Dentistry, Centre for Primary Care and Public Health<br>Roberts, Celia; King's College London, Department of Education and Professional Studies<br>Li, Shuangyu; King's College London, Division of Medicine<br>Weber, Orest; Lausanne University, Psychiatric Liaison Service<br>Singy, Pascal; Lausanne University, Psychiatric Liaison Service |
| <b>Primary Subject Heading</b>: | Qualitative research                                                                                                                                                                                                                                                                                                                                                                                                 |
| Secondary Subject Heading:      | Communication                                                                                                                                                                                                                                                                                                                                                                                                        |
| Keywords:                       | Information technology < BIOTECHNOLOGY & BIOINFORMATICS, MEDICAL EDUCATION & TRAINING, QUALITATIVE RESEARCH                                                                                                                                                                                                                                                                                                          |
|                                 |                                                                                                                                                                                                                                                                                                                                                                                                                      |

SCHOLARONE™  
Manuscripts

## Beyond the 'dyad': A qualitative re-evaluation of the changing clinical consultation.

**Deborah Swinglehurst\***; Celia Roberts; Shuangyu Li; Orest Weber; Pascal Singy

Deborah Swinglehurst is Senior Clinical Lecturer at the Centre for Primary Care and Public Health, Barts and The London School of Medicine and Dentistry, Queen Mary, University of London, UK.

Celia Roberts is Professor of Applied Linguistics in the Department of Education and Professional Studies, King's College London, UK.

Shuangyu Li is Lecturer in Clinical Communication at the Division of Medical Education, School of Medicine, King's College London, UK.

Orest Weber is Researcher at the Psychiatric Liaison Service, Lausanne University Hospital, Lausanne, Switzerland.

Pascal Singy is Associate Professor of Sociolinguistics and Director of Research at the Psychiatric Liaison Service, Lausanne University Hospital, Lausanne, Switzerland.

**\*Corresponding author at:** Centre for Primary Care and Public Health, Barts and The London School of Medicine and Dentistry, Queen Mary, University of London, 58 Turner Street, London E1 2AB, UK. Email: [d.swinglehurst@qmul.ac.uk](mailto:d.swinglehurst@qmul.ac.uk). Telephone +44 20 7882 7204 Fax +44 20 7882 2552

**Keywords:** globalisation; multilingualism; electronic patient record; clinical communication; technology

**Word count: 4199**

## ABSTRACT

### Objective

To identify characteristics of clinical consultations which do not conform to the traditionally understood communication 'dyad', in order to highlight implications for medical education and develop a reflective 'toolkit' for use by medical practitioners and educators in the analysis of consultations.

### Design

A series of interdisciplinary research workshops spanning 12 months explored the social impact of globalisation and computerisation on the clinical consultation, focusing specifically on contemporary challenges to the clinician-patient dyad. Researchers presented detailed case studies of consultations, taken from their recent research projects. Drawing on concepts from applied sociolinguistics, further analysis of selected case studies prompted the identification of key emergent themes.

### Setting

University departments in the UK and Switzerland.

### Participants

Six researchers with backgrounds in medicine, applied linguistics, sociolinguistics and medical education. One workshop was also attended by PhD students conducting research on healthcare interactions.

### Results

1  
2  
3 The contemporary consultation is characterised by a multiplicity of voices. The  
4 incorporation of additional voices in the consultation creates new forms of order (and  
5 *dis-order*) in the interaction. The roles 'clinician' and 'patient' are blurred as they  
6 become increasingly distributed between different participants in the consultation.  
7  
8 These new consultation arrangements make new demands on clinicians which lie  
9 beyond the scope of most educational programmes for clinical communication.  
10  
11  
12  
13  
14  
15  
16

## 17 **Conclusion**

18  
19  
20 Traditional consultation models which assume a 'dyadic' consultation do not  
21 adequately incorporate the realities of many contemporary consultations. A paradox  
22 emerges between the need to manage consultations in a 'super-diverse' multilingual  
23 society, whilst also attending to increasing requirements for standardised protocol-  
24 driven approaches to care and data gathering prompted by computer use in the  
25 consultation.  
26  
27  
28  
29  
30  
31  
32  
33

34 The consultation is changing. Drawing on concepts from applied sociolinguistics and  
35 the findings of these research observations, the authors offer a reflective 'toolkit' of  
36 questions to ask of the consultation in the context of enquiry based learning.  
37  
38  
39  
40

41  
42 **(300 words)**  
43  
44  
45

## 46 **ARTICLE SUMMARY**

### 47 **Strengths and limitations of this study**

- 48  
49  
50  
51  
52  
53
  - Brings insights from applied sociolinguistics to the analysis of consultations
  - Addresses the mismatch between consultations as conceptualised in  
54 communication models and the reality of many contemporary consultations

55  
56  
57  
58  
59  
60

- Offers a research-informed output, a 'reflective toolkit', for use in practice by clinicians and educators
- Focuses on issues relevant to a globalised, technology-driven world, but does not address all types of consultation which breach the communication dyad (e.g. clinician - patient - carer)

**KEYWORDS:** globalisation; multilingualism; electronic patient record; communication skills; technology

## INTRODUCTION

Two of the most significant changes affecting communication in the consultation are the increasing use of computers (the 'technologisation' of care)(1) and globalisation. The use of electronic patient records (EPRs) is gathering pace throughout Europe with the UK, the Netherlands and Scandinavia leading the way. (2-4) Globalisation (the movement of people, their languages, cultural practices, artefacts and 'norms' between countries) is creating 'super-diverse' multilingual populations.(5) According to the 2011 census in England and Wales, 29% of the population were born abroad or have a parent or grandparent born abroad. In Switzerland, 35.1% of over-15s are first- or second-generation migrants.(6) These social changes have significant impacts on the consultation.

Researchers of electronic patient records have coined the term 'triadic' consultation to highlight the computer as an influential third party in the consultation.(7-10) Swinglehurst et al. go further, conceptualising the EPR as bringing a wide range of competing voices to the consultation and shaping its dynamics.(11;12) Likewise, the dynamics of multilingual consultations are changed by the inclusion of professional and *ad hoc* interpreters (untrained family members, staff or volunteers). The resulting configuration has been referred to as a 'trialogue'.(13-18) An increasing number of consultations involve patients (and doctors) communicating in a language other than their first language, or in a variety of the majority language (e.g. English) influenced by their first language. In these consultations the communication barrier may lead to a 'loss' of patient voice (examples 2 and 3 in this paper) or to unresolved misunderstandings arising from subtle differences in speech delivery, word stress and styles of self-presentation. (19)

1  
2  
3 Consultations which incorporate socio-technical or sociolinguistic challenges (or  
4 both) are increasingly the norm in large urban areas. Although medical educators  
5 recognise that consultations are growing in complexity,(20) educational resources  
6 addressing these complexities remain limited. Current consultation models assume a  
7 communication 'dyad' in which two voices (patient and clinician) engage in focussed  
8 interaction using broadly shared ways of communicating. Communication tends to be  
9 envisaged as a series of learned prototypical 'skills' or procedures for accomplishing  
10 clinical tasks rather than as a dynamic interaction which emerges moment-by-  
11 moment, shaped by every interactional nuance along the way. Assumptions about  
12 the nature of communication are reflected in strategies currently advocated for  
13 interpreted consultations such as: advising the interpreter what is expected up front;  
14 explaining the interpreter's role to the patient; allowing ample time; asking one  
15 question at a time; clarifying confusing responses; seeking 'cultural information' from  
16 the interpreter afterwards.(17;21-23) Likewise, in computer mediated consultations  
17 doctors are advised to avoid trying to attend to patient and computer at the same  
18 time (e.g. by 'signposting' computer use), to use mobile monitors and to 'look at the  
19 patient'.(8;24) Although these suggestions are useful, they overlook the fact that the  
20 interaction is itself fundamentally and profoundly changed by these new  
21 arrangements.

22  
23  
24  
25  
26  
27  
28  
29  
30  
31  
32  
33  
34  
35  
36  
37  
38  
39  
40  
41  
42  
43  
44  
45  
46 This paper explores the characteristics of these contemporary consultations through  
47 presentation of case studies selected as 'telling cases' (25) highlighting the  
48 challenges arising in consultations which involve a meeting of more than two voices.  
49 Analytic observations are developed into a reflective 'toolkit' for use in the  
50 educational context while analysing learners' video-recorded consultations.  
51  
52  
53  
54  
55  
56  
57  
58  
59  
60

## METHODS

A series of interdisciplinary workshops was held over a 12- month period bringing together academics specialising in healthcare communication. Their disciplinary backgrounds spanned medicine, applied linguistics, sociolinguistics and medical education. Case study presentations were followed by discussion, leading to further analysis of primary interactional data. The case studies were selected from four ethnographic/sociolinguistic research projects drawing on theme-orientated discourse analysis (26), conversation analysis (27) and linguistic ethnography (28). The research projects had received ethical approval (Thames Valley multi-centre REC 06/MRE12/81; NHS Bradford REC 09/H1302/106; REC of Vaud, Switzerland 271/07; St. Thomas' Hospital local REC).

The selection of case studies was informed by case study methodology and based on a key ethnographic principle, that of 'developing theory through the study of critical cases' (page 20) (29). The workshops drew on Mitchell's concept of a 'telling' case study 'in which the particular circumstances surrounding a case serve to make previously obscure theoretical relationships apparent' (page 239) (25).

So, telling cases from the four research projects were selected as examples of consultations which breach the clinician-patient 'dyad', incorporating additional 'voices'. The authors worked together to identify synergies across them, teasing out themes and valid connections between events and phenomena relevant to medical education. Case studies explored the following: the interactional structure of general practitioners' (GP) consultations involving interpreters; the shaping influence of the EPR in primary care consultations; consultations involving patients communicating in a language other than their first language. The nature of the additional 'voices' in the



1  
2  
3 latter example may not be immediately apparent, but relates to socio-cultural scripts  
4  
5 originating *beyond* the consultation and informing notions of how to present oneself,  
6  
7 ideas about the self (and the clinician), one's relationship to authority, expectations  
8  
9 of the healthcare system, for example. Although there is an extensive literature on  
10  
11 cultural health beliefs, precisely how patients present themselves, how they voice  
12  
13 their concerns and the impact of differences in linguistic background on the  
14  
15 orderliness and distribution of knowledge and expertise have been much less  
16  
17 studied.  
18  
19

## 20 21 **RESULTS**

22  
23 We identified two key interrelated themes which are the main focus of this article:  
24  
25 *orderliness* and *distribution*. We will begin by introducing these themes and will then  
26  
27 present some short extracts of data analysis illustrating how these themes play out in  
28  
29 the contemporary consultation and how they disrupt the dyadic nature of the  
30  
31 consultation.  
32  
33  
34

### 35 36 **'Orderliness' in the contemporary consultation**

37  
38 The 'orderliness' of the consultation has been the subject of much previous research.  
39  
40 Medical educators will be familiar with the stages of the consultation described by  
41  
42 Byrne and Long in 1976,(30) and with more detailed models (e.g. Calgary-  
43  
44 Cambridge) which are currently favoured within educational curricula.(31) These  
45  
46 models describe the consultation in more-or-less discrete phases such as 'gathering  
47  
48 information' and 'explanation and planning'. Each stage is associated with a set of  
49  
50 skills which underpin formative and summative assessments of medical students and  
51  
52 some professional licensing examinations (e.g. the UK Clinical Skills Assessment  
53  
54 forms part of the licensing examination for general practitioners).  
55  
56  
57  
58  
59  
60

1  
2  
3 Apart from the assumption that the consultation, with its various 'phases', is an  
4 orderly affair, these models tend to assume a structuralist orientation to language.  
5  
6  
7 The talk shared between clinician and patient is assumed to represent particular  
8 meanings – talk is simply *representative* of reality. For example, when a clinician  
9 'summarises' the consultation, this summary is assumed to reflect a concise version  
10 of the patient's story, which is in turn assumed to represent the patient's experience.  
11  
12 An alternative *social constructionist* perspective would also consider the additional  
13 work being *accomplished* by summarising – for example: the clinician's opportunity  
14 to take back the 'speaking floor';(32) the organisation of the story; the emphasis  
15 afforded to those aspects perceived to be most salient to diagnostic reasoning or  
16 clinical management; the clinician's construction of their professional identity. From  
17 this perspective the encounter is relatively unstable, and the orderliness of the  
18 consultation, or its identified 'phases' are not so much inevitable *attributes* of the  
19 consultation, but are 'brought about' or 'worked up' through interaction. This 'bringing  
20 about' is informed by previous cumulative experience of what usually happens in the  
21 kind of interaction we recognize as a 'medical consultation', but involves a certain  
22 amount of improvisation along the way.  
23  
24  
25  
26  
27  
28  
29  
30  
31  
32  
33  
34  
35  
36  
37  
38  
39  
40

### 41 **'Distribution' in the contemporary consultation**

42  
43  
44 In consultations that lie beyond the 'dyad' by inclusion of additional people (e.g.  
45 interpreters) or technologies (e.g. electronic patient records) or patients whose first  
46 language is not English, we face new configurations in terms of the distribution of  
47 knowledge, power, authority and social identities. In what has been called the  
48 "crowded" consultation(33) where many voices meet, new questions become salient  
49 and contested. For example: *Who is doing the talking? Whose voice is heard? How*  
50  
51  
52  
53  
54  
55  
56  
57  
58  
59  
60

1  
2  
3 *is knowledge distributed? What is important medical knowledge? Whose interests*  
4 *are being served? Who is the patient? Who is the clinician?*  
5  
6  
7

## 8 **Analysis of 'orderliness' and 'distribution' of roles in the contemporary** 9 **consultation**

10  
11  
12  
13 In this section we will illustrate how 'orderliness' and 'distribution' play out in  
14 consultations which breach the communication dyad, using selected data extracts.  
15  
16 These examples combine the micro-analytic methods used in conversation analysis  
17 (CA) with ethnographic observation of the relevant institutional contexts, mindful that  
18 this broader context shapes interaction in important ways. CA considers the detailed  
19 systematic patterns and regularities that arise as each speaker takes up, interprets  
20 and responds to the other's turn.(34;35) Our case studies show how the well-  
21 described orderliness of the consultation becomes disturbed when additional voices  
22 are introduced, as new forms of order and dis-order emerge and care becomes  
23 increasingly distributed. We have retained the transcribing conventions used in each  
24 original study (see Appendix). The text is interspersed with suggestions of reflective  
25 questions which emerge from our data analysis. These questions are designed for  
26 use by learners as they play back their own video-recorded consultations, sensitising  
27 them to the particular challenges posed in these types of consultations. We also  
28 hope that the questions will encourage learners to discover the importance of  
29 considering the consultation as an emergent *co-constructed* phenomenon, requiring  
30 improvisation.  
31  
32  
33  
34  
35  
36  
37  
38  
39  
40  
41  
42  
43  
44  
45  
46  
47  
48  
49  
50

51  
52 First, we look at the opening of a consultation between a nurse (N) and patient (P),  
53 English speakers who haven't met before (**Figure 1**). The institutional context is an  
54 annual asthma check, a requirement of the UK Quality and Outcomes Framework  
55  
56  
57  
58  
59  
60

1  
2  
3 (QOF) for which incentive payments are made. The nurse is completing a computer  
4 template (form) during the consultation. The transcript includes notes on bodily  
5 conduct and the computer screen display.  
6  
7  
8  
9

10 <<INSERT FIGURE 1 ABOUT HERE>>  
11

12  
13 She frames the consultation as an 'assessment' emphasising it is really (01:08) or  
14 very (01:19) straightforward. The linearity of the upcoming consultation is alluded to  
15 as she counts a 3-part list with her fingers. She demarcates the purpose of the clinic,  
16 laying it out as an orderly affair and (implicitly) setting limits on what can happen.  
17 She adds to this later (at 2:09, transcript not shown), while gesturing towards the  
18 EPR: *"What I've got here is some questions that I – I need to ask you. They're fairly  
19 straightforward ones but what they tend to do with is that they will flag up whether  
20 there >actually< we have got what w- what I would call breakthrough symptoms."*  
21 Reiterating that it is 'straightforward', the phrase *"I need to ask you"* points to an  
22 underlying institutional requirement. Reassurance focuses on an anticipated  
23 orderliness of the clinic, dealing up front with any misalignment between what the  
24 patient may expect and what the nurse is required to do. But this is a different kind of  
25 order to that which we might expect. This is an orderliness in which the electronic  
26 template is instrumental, rather than one which emerges through dialogue between  
27 clinician and patient.(12)  
28  
29  
30  
31  
32  
33  
34  
35  
36  
37  
38  
39  
40  
41  
42  
43  
44  
45  
46  
47

48 The nurse then goes on to speak *not* of symptoms, but of inhalers (transcript  
49 omitted) and then smoking. Here the template introduces a topic (smoking) which  
50 seems tangential to this patient's particular circumstances, although it is important to  
51 asthma care in general terms, and has institutional significance, being a QOF  
52 indicator. The EPR thus brings an institutional voice into the encounter, making  
53  
54  
55  
56  
57  
58  
59  
60

1  
2  
3 relevant the patient's identity as a lifelong non-smoker in this context. It contributes  
4  
5 to defining what is important medical knowledge, reproducing particular definitions of  
6  
7 'quality' in practice - gathering data about (non-)smoking for QOF being an example.  
8  
9 The patient becomes an epidemiological informant and 'quality' is transformed into  
10  
11 meeting an institutional requirement rather than focussing on the specific quality of  
12  
13 care of the individual. At 2.50 - 2.52 the nurse's emphatic evaluations "*excellent,*  
14  
15 *that's great*" are spoken towards the EPR as she types, apparently referring to her  
16  
17 satisfaction at meeting its demands, the patient watching from the sidelines. At the  
18  
19 very least it is ambiguous to whom (or what) these superlatives relate.  
20  
21

22  
23 The analytic question of "*Who is doing the talking?*" is at issue here. For example,  
24  
25 the authorship of the words at 2:47 is apparently distributed between the nurse and  
26  
27 the EPR. We see a disruption of the usual conventions of conversation, with this  
28  
29 comment spoken by the nurse as she looks at the computer screen rather than at  
30  
31 the patient to whom she expects to hand over the speaking 'turn'. The nurse's  
32  
33 attention is divided between what has been called the patient *embodied* and the  
34  
35 patient *inscribed* (36;37) as the patient becomes (metaphorically) distributed  
36  
37 between person and record.(36) The nurse is *cognitively* oriented to the patient as  
38  
39 she establishes his smoking status by looking at the EPR, but the *affective* aspect of  
40  
41 her involvement - which Goffman has highlighted as crucial in a social interaction -  
42  
43 is compromised.(38) This "template talk" is met by a 0.4 second pause. The nurse  
44  
45 then turns to face the patient, adding "*that's what I've got here*" - this time evoking a  
46  
47 response, as they jointly repeat "*never smoked*", words which were initially displayed  
48  
49 on the EPR screen (visible only to the nurse).  
50  
51  
52  
53

54  
55 Box 1 suggests some reflective questions to ask of consultations involving the EPR.  
56  
57 Students may find it helpful to use the transcript in Figure 1 to gain familiarity with  
58  
59  
60

1  
2  
3 these questions before asking the same questions of their own video-recorded  
4 consultations. In the following sections, we incorporate reflective questions arising  
5 from our data analysis as applicable to different kinds of complex consultation.  
6  
7  
8  
9

10 <<INSERT BOX 1 ABOUT HERE>>  
11

12  
13 Our next example (**Figure 2**) is from a GP consultation with a patient from Nigeria  
14 who speaks a variety of English that differs from local English. Whilst on holiday in  
15 Nigeria he was bitten by a dog, raising the question of whether he might have been  
16 exposed to rabies (lines 1-4) and considered for vaccination.  
17  
18  
19  
20  
21

22 <<INSERT FIGURE 2 ABOUT HERE>>  
23

24  
25 This example illustrates an unresolved ambiguity which arises from different  
26 conventions in standard English and Nigerian English over the use of contrastive  
27 stress (indicated by \* in data). Disorder, misunderstanding, and an incorrect  
28 assessment ensue. In lines 4-7 the patient tells the GP he knows the dog's owner  
29 and that the dog visits the vet regularly. This reassures the GP that the patient is at  
30 low risk (line 12: "*oh fair enough*") and he in turn later reassures the patient that no  
31 vaccination is needed. In fact the patient was conveying his concern that the dog  
32 may **not** be free of rabies, and that the owner could not be trusted. When the patient  
33 says "*they told me the dog go to the vet regular but that's what they said*" (lines  
34 6,7,9, highlighted in bold in transcript) he emphasizes the agent ("*they*") and the  
35 content of the agent's talk ("*what*"). The equivalent sentiment in standard English  
36 would be "*they told me the dog goes to the vet regular, but that's what they said*" with  
37 the emphasis on the verbs ("told", "said"). Although the patient offers further hints of  
38 his scepticism in line 13 - a hesitation, laughter and the word "but" – the underlying  
39 ambiguity is passed over, and absent from the institutional record made by the  
40  
41  
42  
43  
44  
45  
46  
47  
48  
49  
50  
51  
52  
53  
54  
55  
56  
57  
58  
59  
60

1  
2  
3 doctor. Misunderstandings, or the illusion of understanding, which result from small  
4 and subliminally processed differences in talk, are more frequent in a multi-lingual  
5 patient population(19) and challenge conventional orderliness. But no simple  
6 behaviours can be taught in situations of super-diversity as our next two examples  
7 also show.  
8  
9

10  
11  
12  
13  
14  
15 **Figure 3** shows an extract of a video-recorded consultation in a Swiss pain clinic  
16 (translated from French) in which consent is sought for a spinal injection. The patient  
17 left his home country 10 years earlier after a war, and has very limited command of  
18 French. He has chronic low back pain for which he has received spinal injections. He  
19 is worried about the risks involved, because a previous consent form (translated by  
20 his daughter) referred to a risk of paralysis.  
21  
22  
23  
24  
25  
26  
27

28  
29 **<<INSERT FIGURE 3 ABOUT HERE>>**  
30

31  
32 As in the previous example, there is obvious asymmetry of the linguistic resources  
33 available. Indeed the entire extract might be regarded as a continuous, extended and  
34 only partly repaired misunderstanding. Both parties struggle to grasp at least some  
35 meaning in the words of the other. An interview with both interactants afterwards  
36 (data not shown) suggested that some areas of shared understanding were reached:  
37 the patient's fear of the injection, the positive impact of a previous injection and  
38 agreement to proceed today. But other communicative efforts failed, including the  
39 doctor's attempt to reassure the patient that paralysis does not happen often.  
40 Indeed, the patient reported that the doctor had particularly reminded him of the risks  
41 of paralysis adding that he, the patient, had to take responsibility for this risk. The  
42 patient's fear (linked it appears to some past experience in the war) is not explored.  
43  
44  
45  
46  
47  
48  
49  
50  
51  
52  
53  
54  
55  
56  
57  
58  
59  
60

1  
2  
3 Arguably under conditions of such scarce common linguistic means this topic may be  
4  
5 deemed too complex to tackle; the patient's voice from the past is lost.  
6  
7

8 Phenomena of discursive dispersion and fragmentation of the clinical decision-  
9  
10 making process have previously been described in monolingual contexts,(39;40) but  
11  
12 they become magnified when patients have limited proficiency in the language of  
13  
14 consultation. In this multilingual context the ideals of shared decision-making within  
15  
16 an ordered consultation are eroded. In this example, the doctor first presents his  
17  
18 idea, tries to convince the patient of the benefits of another injection and goes on to  
19  
20 investigate the patient's worries and possible reasons for disagreement. But the  
21  
22 participants fail to connect the discursive threads of this discussion to the final  
23  
24 decision. Patient consent follows immediately after major interactional troubles,  
25  
26 culminating in a self-critical meta-communicative account by the patient (*"I don't*  
27  
28 *know how to explain well"*) and an abrupt topic shift by the doctor. The doctor  
29  
30 appears to cut to the decision making when he gives up on achieving further clarity  
31  
32 about the patient's stance.  
33  
34  
35  
36  
37

38 << INSERT BOX 2 >>  
39

40 Consultations like those in **Figures 2 and 3** in which the clinician and patient are not  
41  
42 'in tune' with each other require considerable and not always successful  
43  
44 collaborative work by both parties to prevent, recognise and repair  
45  
46 misunderstandings.(41) The use of interpreters may address these issues to some  
47  
48 extent, but not without introducing different challenges. The work of consulting  
49  
50 becomes distributed between at least three participants, changing the relationship of  
51  
52 the speakers to their own words and so disturbing roles and identities. The  
53  
54 orderliness in interpreted consultations is changed, both in terms of overall structure  
55  
56  
57  
58  
59  
60



1  
2  
3 and in micro-interactional patterns. Clinicians have to do more than simply establish  
4  
5 consensus on the mode of communication and the role of the interpreter as  
6  
7 suggested by recent guidelines.(16;17) At the micro-level, extra verbal exchanges  
8  
9 are required to clarify misunderstandings (as we saw in Figures 2 & 3). The  
10  
11 traditional doctor↔patient (dyadic) interactional sequence becomes a more  
12  
13 complicated 'triadic' pattern. Close inspection of interpreted consultations shows that  
14  
15 this assumed prototypical triadic sequence (doctor→interpreter→patient or  
16  
17 patient→interpreter→doctor) is not always observed by participants, so that one or  
18  
19 more participants' voices are 'lost'.(16;42) The power to decide who talks next is  
20  
21 *unequally* distributed among the three participants – with patients at the bottom of  
22  
23 the hierarchy. Even when the prototypical doctor-interpreter-patient sequence *is*  
24  
25 followed, there remains considerable scope for misunderstanding, due to ambiguity  
26  
27 over interpreter's role and how the interpreting task is actually done in practice. The  
28  
29 interpreter delivers a 'hybrid' voice which incorporates the voices of all three  
30  
31 participants in the interaction. **Figure 4** shows an extract from an interpreted  
32  
33 consultation in England with a Czech-speaking patient who has complained of  
34  
35 headaches. It gives some insight into how the themes of orderliness and distribution  
36  
37 play out in an interpreted consultation.  
38  
39  
40  
41  
42

43  
44 <<INSERT FIGURE 4 ABOUT HERE>>  
45

46  
47 From lines 1 to 10, the participants follow the triadic sequence in their turn-taking.  
48  
49 However, what the doctor and patient hear is pre-processed (re-contextualised) by  
50  
51 the interpreter. In Line 1, the doctor asks a question. Prior to the question he refers  
52  
53 to an earlier discussion about the patient's pain, signposting a change of topic.  
54  
55 However, this signposting is omitted by the interpreter in Lines 3-4. Similarly, in Lines  
56  
57 5-7 the interpreter adds '*that start afternoon*' into her translation although the patient  
58  
59  
60

1  
2  
3 did not say these words here. As Bolden points out, an interpreter is constantly  
4 choosing the quantity and quality of information that is translated, thus creating a  
5 hybrid voice and assigning themselves an extra role as either 'doctor' or 'patient' with  
6 blurring of the usual boundaries between the two.(43) The potential for voices to  
7 become 'lost' in this process is greatest when the prototypical triadic sequence is not  
8 followed.  
9

10 At line 10, the doctor comments on the interpreter's response ("*Interesting. That's*  
11 *good*"). If the (assumed) triadic sequence was followed, one would expect either that  
12 the doctor would continue talking at this point, or that he would pass the speaking  
13 turn to the interpreter to translate his words. Either way, we would not expect the  
14 patient to have a turn here. However, the patient (line 11) brings in a new topic,  
15 ostensibly in an 'inappropriate' place. Her utterance is not translated and goes  
16 unheard as the doctor interrupts the patient (line 13) before she can finish her talk;  
17 this marks the patient's entry as 'not legitimate'. The doctor and the interpreter then  
18 continue the conversation following the triadic sequence. In the wider dataset from  
19 which this extract is taken, we found that doctors also speak at such 'inappropriate  
20 places'. However there is a difference. In most cases, the words of the doctor *are*  
21 translated, and the patient is put 'on hold' while this is done. In other words, when  
22 the prototypical doctor-interpreter-patient sequence breaks down it is the *interpreter*  
23 who takes on the role of 'distributor' of speaking turns and decides whose voice will  
24 be preferentially heard. In our dataset, interpreters tended to prioritise the doctor's  
25 right to speak, as illustrated in **Figure 4**.  
26  
27  
28  
29  
30  
31  
32  
33  
34  
35  
36  
37  
38  
39  
40  
41  
42  
43  
44  
45  
46  
47  
48  
49  
50  
51

52  
53 << INSERT BOX 3 ABOUT HERE >>  
54  
55  
56  
57  
58  
59  
60

## DISCUSSION

Rapid technological and demographic change has brought challenges to the consultation which were not anticipated when the consultation models currently taught to students were developed. Using a selection of 'telling' cases as a basis for analysis we have been able to develop novel conceptual ideas about the contemporary consultation which challenge normative assumptions, showing that the notion of the consultation as a dyadic meeting of two speakers who share communicative resources is frequently challenged. Our priority has been on depth of analysis rather than breadth, with our selection of case studies informed by the 'opportunity to learn' rather than by concerns around 'typicality'.<sup>(44)</sup> Based on a detailed study of four contrasting cases we suggest there are complex new configurations of voices in the consultation, and - as a consequence of this - the potential for 'losing' the patient voice. These challenges to the 'dyadic' consultation rarely receive explicit attention in the educational curriculum. One striking observation which emerges from our data is that the twin social pressures of globalisation and technologisation appear to place paradoxically opposing demands on the consultation. On the one hand, clinicians are challenged with increasingly diverse, unpredictable consultations from a sociolinguistic perspective, requiring flexibility and a tolerance of ambiguity. On the other, there is increasing pressure to 'standardise' practices, for example through greater use of EPR templates.

Building on our analysis of these case studies we have offered a series of reflective questions which may be relevant to ask of complex consultations which take on these new kinds of orderliness and in which conventional understandings of the roles of clinician and patient become blurred. These questions have not yet been tested empirically in an educational setting and do not constitute a definitive checklist. They

1  
2  
3 may neither be relevant to all consultations nor necessarily comprehensive, but we  
4  
5 hope that they are a starting point to promote observation and discussion about the  
6  
7 consultation from an orientation which embraces its new complexities. Further  
8  
9 empirical research is required to test the value of this toolkit as an educational  
10  
11 intervention in practice and to refine it in the context of further educational research.  
12  
13

14 We would like to invite debate amongst medical educators about how to adapt,  
15  
16 extend or revise consultation models to ensure that these important aspects of the  
17  
18 contemporary consultation do not remain overlooked. We suggest that an orientation  
19  
20 to the consultation as a dynamic process which is co-constructed between clinician  
21  
22 and patient is helpful, one in which the structure (we prefer 'orderliness') emerges  
23  
24 out of the collaborative work of clinician and patient (and others) and which depends  
25  
26 on how the 'work' of consulting is distributed between participants. Regarding the  
27  
28 consultation as a co-construction demands more than a range of 'add-on' prompts  
29  
30 describing specific clinician behaviours. It encompasses a shift away from the idea  
31  
32 that consulting is a set of competences to be mastered, towards a more analytical  
33  
34 orientation. The most important overarching question to ask of the consultation shifts  
35  
36 from "Did I do that well?" towards "What did we accomplish there?" This brings the  
37  
38 contribution of the patient, and all relevant parties (or 'voices') into clearer view. The  
39  
40 questions we offer to learners within our reflective 'toolkit' in this paper fall broadly  
41  
42 within this overarching question.  
43  
44  
45  
46  
47  
48

49 We urge educators to consider critically how their approach to teaching clinical  
50  
51 communication might change if instead of assuming that the talk *represents* some  
52  
53 kind of existing reality they also encourage students to consider conceptualising talk  
54  
55 as *constructing* reality, an assumption which underpins this paper. We suggest that  
56  
57 greater use of the detailed analysis of video-recordings of real (as opposed to  
58  
59  
60

1  
2  
3 simulated) consultations may be helpful, exposing learners - as consulters and  
4  
5 critical observers - to the kinds of complexities that our research highlights. For  
6  
7 example, a DVD by Roberts et al. entitled "*Doing the Lambeth Talk*" shows how  
8  
9 misunderstandings in the multilingual consultation can be avoided and repaired.  
10

## 11 12 13 14 15 **ACKNOWLEDGMENTS**

16  
17 The authors would like to thank the staff and patients who agreed to take part in the  
18  
19 four original research projects from which the data presented in this article are  
20  
21 selected.  
22

## 23 24 25 **COMPETING INTERESTS**

26  
27 None declared  
28

## 29 30 31 **FUNDING**

32  
33 The research projects on which this paper is based were funded by: National  
34  
35 Institute for Health Research Doctoral Fellowship (DS); Sir Siegmund Warburg  
36  
37 Voluntary Settlement (CR); NHS Bradford & Airedale PhD Fellowship (SL); Swiss  
38  
39 National Science Foundation (OW and PS).  
40

## 41 42 43 44 **CONTRIBUTORSHIP STATEMENT**

45  
46 All of the authors of this paper participated in the preparation and presentation of  
47  
48 case studies (drawn from their own empirical research) in the research workshops.

49  
50 All authors participated in the re-analysis of case study data to identify emergent  
51  
52 cross-cutting themes, and in the development of the analysis into practitioner-  
53  
54 relevant resources. DS wrote the first draft of the paper and revised it in response to  
55  
56 critical commentary from all of the remaining authors.  
57  
58  
59  
60

## Reference List

- (1) Peacock JW, Nolan PW. Care under threat in the modern world. *Journal of Advanced Nursing* 2000;32:1066-70.
- (2) Knottnerus JA. The Role of the Electronic Patient Record in the Development of General Practice in the Netherlands. *Methods of Information in Medicine* 1999;38:350-4.
- (3) Protti D, Johansen I. Widespread Adoption of Information Technology in Primary Care Physician Offices in Denmark: A Case Study. Downloadable from [http://www.commonwealthfund.org/~media/Files/Publications/Issue%20Brief/2010/Mar/1379\\_Protti\\_widespread\\_adoption\\_IT\\_primary\\_care\\_Denmark\\_intl\\_ib.pdf](http://www.commonwealthfund.org/~media/Files/Publications/Issue%20Brief/2010/Mar/1379_Protti_widespread_adoption_IT_primary_care_Denmark_intl_ib.pdf). The Commonwealth Fund; 2010.
- (4) RCGP. Information Management and Technology in General Practice: RCGP Information Sheet No.7. 2005.
- (5) Vertovec S. Super-diversity and its implications. *Ethnic and Racial Studies* 2007;30:1024-54.
- (6) Office fédéral de la statistique. Relevé structurel du recensement fédéral de la population selon la langue et la religion. Available from: <http://www.bfs.admin.ch/bfs/portal/fr/index/news/02/03/02.html>. 2013.
- (7) Scott D, Purves I. Triadic relationship between doctor, computer and patient. *Interacting with Computers* 1996;8(4):347-63.
- (8) Ventres W, Kooienga S, Marlin R. EHRs in the Exam Room: Tips on Patient-Centred Care. *Family Practice Management* 2006;13(3):45-7.
- (9) Margalit RS, Roter D, Dunevant MA, Larson S, Reis S. Electronic medical record use and physician-patient communication: An observational study of Israeli primary care encounters. *Patient Education and Counseling* 2006 Apr;61(1):134-41.
- (10) Pearce C. Doctors, Patients and Computers, the New Consultation. PhD Thesis Department of General Practice, The University of Melbourne; 2007.
- (11) Swinglehurst D, Roberts C, Greenhalgh T. Opening up the "black box" of the electronic patient record: A linguistic ethnographic study in general practice. *Communication and Medicine* 2011;8(1):3-15.

- 1  
2  
3 (12) Swinglehurst D, Greenhalgh T, Roberts C. Computer templates in chronic disease  
4 management: ethnographic case study in general practice. *BMJ Open* 2012;2:e001754.  
5  
6 (13) Greenhalgh T, Voisey C, Robb N. Interpreted consultations as 'business as usual'? An analysis  
7 of organisational routines in general practices. *Sociology of Health and Illness* 2007;29:931-  
8 54.  
9  
10 (14) Li S, Pearson D, Escott S. Language barriers within primary care consultations: an increasing  
11 challenge needing new solutions. *Education for Primary Care* 2010;21:385-91.  
12  
13 (15) Hale SB. *Community Interpreting*. Basingstoke: Palgrave Macmillan; 2007.  
14  
15 (16) Seale C, Rivas C, Kelly M. The challenge of communication in interpreted consultations in  
16 diabetes care: a mixed methods study. *Br J Gen Pract* 2013;DOI: 10.3399/bjgp13X663082.  
17  
18 (17) Bischoff A, Loutan L. *Other Words, Other Meanings - a guide to health care interpreting in*  
19 *international settings*. Geneva: Serve de médecine internationale et humanitaire, HUG;  
20 2008.  
21  
22 (18) Guex P, Singy P. *Quand la médecine à besoin d'interprètes*. Genève: Éditions médecine et  
23 *hygiène*; 2003.  
24  
25 (19) Roberts C, Moss B, Wass V, Sarangi S, Jones R. Misunderstandings: a qualitative study of  
26 primary care consultations in multilingual settings, and educational implications. *Medical*  
27 *Education* 2005;39:465-75.  
28  
29 (20) Lown B, Rodriguez D. Lost in Translation? How Electronic Health Records Structure  
30 Communication, Relationships, and Meaning. *Academic Medicine* 2012;87:392-4.  
31  
32 (21) Kai J. *Valuing diversity: a resource for health professional training to respond to cultural*  
33 *diversity*. London: Royal College of General Practitioners; 2006.  
34  
35 (22) Tebble H. *Medical Interpreting: Improving communication with your patients*. Geelong,  
36 *Victoria: Deakin University*; 1998.  
37  
38 (23) Lie D, Bereknyei S, Braddock C, Encinas J, Ahearn S, Boker J. Assessing Medical Students'  
39 *Skills in Working with Interpreters During Patient Encounters: A Validation Study of the*  
40 *Interpreter Scale*. *Academic Medicine* 2009;84:643-50.  
41  
42 (24) Booth N, Kohannejad J, Robinson P. *Information in the consulting room - training package*.  
43 *Sowerby Centre for Health Informatics at Newcastle*; 2002 Jul.  
44  
45 (25) Mitchell J. Producing data: Case studies. In: Ellen R, editor. *Ethnographic Research: A Guide*  
46 *to General Conduct*. London: Academic Press; 1984. p. 237-41.  
47  
48 (26) Roberts C, Sarangi S. Theme-oriented discourse analysis of medical encounters. *Medical*  
49 *Education* 2005;39:632-40.  
50  
51 (27) Heritage J. Goffman, Garfinkel and Conversation Analysis. In: Wetherell M, Taylor S, Yates S,  
52 *editors. Discourse Theory and Practice*. London: Sage Publications; 2001. p. 47-56.  
53  
54  
55  
56  
57  
58  
59  
60

- 1  
2  
3 (28) Rampton B, Tusting K, Maybin J, Barwell R, Creese A, Lytra V. UK Linguistic Ethnography: A  
4 discussion paper. Downloadable from [http://www.ling-](http://www.ling-ethnog.org.uk/documents/papers/ramptonetal2004.pdf)  
5 [ethnog.org.uk/documents/papers/ramptonetal2004.pdf](http://www.ling-ethnog.org.uk/documents/papers/ramptonetal2004.pdf). 2004.  
6  
7 (29) Hammersley M. What's Wrong with Ethnography? London: Routledge; 1992.  
8  
9 (30) Byrne PS, Long BEL. Doctors Talking to Patients. A Study of the Verbal Behaviour of General  
10 Practitioners Consulting in their Surgeries. London: HMSO; 1976.  
11  
12 (31) Kurtz S, Silverman J. The Calgary-Cambridge referenced observation guides: an aid to  
13 defining the curriculum and organising the teaching in communication training programmes.  
14 Medical Education 1996;30:83-9.  
15  
16 (32) Edelsky C. Who's got the floor? Language and Society 1981;10(3):383-421.  
17  
18 (33) Davies P. The crowded consultation. Br J Gen Pract 2012;62:648-9.  
19  
20 (34) Heritage J, Maynard DW. Communication in Medical Care. Cambridge: Cambridge University  
21 Press; 2006.  
22  
23 (35) Schegloff EA. Notes on a conversational practice: formulating place. In: Sudnow D, editor.  
24 Studies in Social Interaction. New York: Free Press; 1972.  
25  
26 (36) Robinson JD. Getting Down to Business: Talk, Gaze and Body Orientation during Openings of  
27 Doctor-Patient Consultations. Human Communication Research 1998;25(1):97-123.  
28  
29 (37) Ruusuvuori J. Looking means listening: coordinating displays of engagement in doctor-  
30 patient interaction. Social Science & Medicine 2001;52(7):1093-108.  
31  
32 (38) Goffman E. Involvement. Behavior in Public Places. New York: The Free Press; 1966. p. 33-42.  
33  
34 (39) Atkinson P. Medical discourse, evidentiality and the construction of professional  
35 responsibility. In: Sarangi S, Roberts C, editors. Talk, work and institutional order. Berlin, New  
36 York: Mouton de Gruyter; 1999.  
37  
38 (40) Gwyn R, Elwyn G. When is a shared decision not (quite) a shared decision? Negotiating  
39 preferences in a general practice encounter. Social Science & Medicine 1999;49(4):437-47.  
40  
41 (41) Roberts C. Continuities and Discontinuities in Doctor-Patient consultations in a multilingual  
42 society. In: Gott M, Salager-Meyer F, editors. Advances in Medical Discourse Analysis: Oral  
43 and Written Contexts. Bern: Peter Lang; 2006. p. 177-96.  
44  
45 (42) Li S. Co-construction of interpreted conversation in medical consultations. Applied  
46 Linguistics Review 2013;4:127-49.  
47  
48 (43) Bolden GB. Toward understanding practices of medical interpreting: interpreters'  
49 involvement in history taking. Discourse Studies 2000;2:387-419.  
50  
51 (44) Stake RE. Qualitative Case Studies. In: Denzin NK, Lincoln YS, editors. The Sage Handbook of  
52 Qualitative Research. 3rd ed. Sage Publications, Inc; 2005. p. 443-66.  
53  
54  
55  
56  
57  
58  
59  
60



Figure 1. New forms of order and the distribution of authorship in the asthma clinic

| Time                          | N/P | Spoken word                                                                                                                                                            | Bodily conduct / notes on EPR                                                                          |
|-------------------------------|-----|------------------------------------------------------------------------------------------------------------------------------------------------------------------------|--------------------------------------------------------------------------------------------------------|
| 01:08                         | N   | So really straightforward.<br>(0.4)                                                                                                                                    | N puts paper on desk<br>N rotates body and gaze to face P, her hands on her lap.<br>P looking at N     |
| 01:09                         | N   | Asthma assessment<br>(0.4)                                                                                                                                             |                                                                                                        |
|                               | P   | Okay                                                                                                                                                                   | P nods                                                                                                 |
| 01.11                         | N   | to see how your asthma's do:ing:                                                                                                                                       | N raises both hands in front                                                                           |
| 01.13                         | N   | what you're doing w- with it when<br>it's good, what you do with it<br>when it's ba:d,<br>(0.2)<br>have you any problems with your<br>↑inhalers<br>(0.4) .hhh<br>(0.5) | N uses fingers to count (on "good", "bad", "problems")<br><br><br><br>N hands open out in front of her |
| 01.19                         | N   | Very straightforward stuff                                                                                                                                             | N hands to lap                                                                                         |
|                               | P   | Okaly                                                                                                                                                                  | P nods                                                                                                 |
|                               | N   | [all right?<br>.hhh                                                                                                                                                    |                                                                                                        |
| [lines of transcript omitted] |     |                                                                                                                                                                        |                                                                                                        |
| 02:46                         | N   | So:: er<br>(( C ))                                                                                                                                                     | N turns to face screen                                                                                 |
| 02:47                         | N   | Ho- you've never smoked.<br>(0.4)                                                                                                                                      | N -> EPR ( <i>last entry in template reads 'never smoked'</i> )                                        |
|                               | N   | that's what [i've got here                                                                                                                                             | N turns head towards P                                                                                 |
|                               | Pt  | [no<br>(0.4)<br>[never smoked]                                                                                                                                         | P looking at N                                                                                         |
| 02:50                         | N   | [never smoked]<br>(( C ))<br>[Ex c] ell [ent]<br>[ C ] [ C ]                                                                                                           | N turns back to look at screen. Emphatic keystroke                                                     |
| 02:52                         | N   | [Th]at's gr[:e:at ]<br>[C] [C ]                                                                                                                                        | N looking at screen, typing keystrokes                                                                 |

Figure 2. Dis-order arising from different conventions in intonation

|    |    |                                                                   |
|----|----|-------------------------------------------------------------------|
| 1  | GP | what kind of dog was that (.) it was somebody's (.) dog=          |
| 2  | Pt | =yes somebody's                                                   |
| 3  | GP | it was a stray dog                                                |
| 4  | Pt | no no it was somebody's dog                                       |
| 5  | GP | right                                                             |
| 6  | Pt | yes I:: made an enquiry they said that- <b>they *they told me</b> |
| 7  |    | <b>the dog go to the vet regular</b>                              |
| 8  | GP | *right *okay                                                      |
| 9  | Pt | <b>but that's *what they said</b>                                 |
| 10 | GP | right (.) *right right so did you know the owner or did=          |
| 11 | Pt | = I know the owner =                                              |
| 12 | GP | = oh fair enough (.) so                                           |
| 13 | Pt | <b>erm:: ((laughs)) but</b>                                       |
| 14 | GP | did you see any doctor then                                       |
| 15 | Pt | no                                                                |

1  
2  
3 **Figure 3. Negotiating consent for a spinal injection**  
4

- 5 103. Dr: because I thought I'd give you an injection today  
6 104. Pt: =no  
7 105. Dr: =yes, give one  
8 106. Pt: =yes  
9 107. Dr: But if you don't want, I won't. I, for me, it's not a problem giving you an injection  
10 108. Pt: =Yeah  
11 109. Dr: =I don't think that it's a big problem for you either  
12 110. Pt: mmh mmh.  
13 111. Dr: but I think that after the other injection, you had a benefit, you felt better after the injection in  
14 October . . . Didn't you?  
15 112. Pt: mmh. ((*mimics express perplexity*))  
16 113. Dr: So that's why I'd like to do it again, if you, if you don't want, no, I won't do it, if you say, er, you  
17 are afraid, you say, er, after you are getting paralyzed or whatever, I won't do it.  
18 114. Pt: mmh . well it's me now not think more, not think right . . . not er er . . . er don't know it's the cause  
19 that how is paralyzed, for me speaking?  
20 115. Dr: =you [told me]  
21 116. Pt: [oh but yes]  
22 117. Dr: you told me before  
23 118. Pt: =yeah  
24 119. Dr: =you said, you were afraid of getting paralyzed  
25 120. Pt: =yeah  
26 121. Dr: =so, this happens not often  
27 122. Pt: =and next, the next (1) here keep . water. ((*patient indicates non verbally something running*  
28 *down from his forehead to his temples*))  
29 123. Dr: =where?  
30 124. Pt: here, next (1) er injection, it's me, it's the, it's the, back pain, me come, immediately injection ah  
31 . . ah, that's not much pain, after. problem, it's same like war, ah . in my country, war and then, I  
32 don't know how to explain well  
33 125. Dr: well, I don't know, if, today, I tell you we give the injection, we're gonna give the injection, do  
34 you agree or not  
35 126. Pt: =yes  
36 127. Dr: =then we'll give it  
37  
38  
39  
40  
41

42 1. In this translation "next" probably means "last" – this was a recurring error of vocabulary throughout the  
43 consultation  
44  
45  
46  
47  
48  
49  
50  
51  
52  
53  
54  
55  
56  
57  
58  
59  
60

Figure 4 Lost voices in distributed turn-taking sequence organization (English translation in italics)

1. Dr: =An (.) she says it starts in the afternoon::n (.) every day (0.3) does it last (0.4) until
2. she goes to bed, how long does it last for °in the afternoon°
3. Int: ako dlho to trvá
4. *How long does it last for*
5. Pt: tak je to hodinu, dva, to strašne bolí a potom prestane.
6. *well, it is for an hour, two, it hurts badly and then it stops.*
7. Int: ok, that start afternoon. She feel that pain about for one two hours
8. Dr: one or two h[ours
9. Int: [and after that go away:: °ok°
10. Dr: alright↑. Interesting. That's good.
11. Pt: A ešte by som sa chcela povedať, [že ja nosím oku okuliare.
12. *And I would also like to say that I wear gla glasses.*
13. Dr: [could you (0.59) show me where she feels it?
14. Int: u:hm Môžte ukáza[ť
15. *U:hm Can you show*
16. Pt: [Tu.
17. *Here*

1  
2  
3 **Box 1. Reflective questions based on Case 1 which might inform analysis of a student's own**  
4 **video-recorded consultations**  
5

6 Which 'voices' can I identify as being present in this consultation?  
7     Which voices are being privileged at different times in the consultation and why?  
8     What is the consequence of this?  
9     How do I ensure that the patient's voice is not lost?

10 How and to what extent do I need to re-shape my own communication norms / style to accommodate  
11 the specific arrangement of people and computer in this consultation?  
12

13 How, and to what extent am I fully 'involved' in this consultation?  
14     What does this mean to me and what challenge is this particular consultation presenting?  
15     To whom and what am I attending, and with what purpose?  
16

17 How am I incorporating computer templates and prompts?  
18     What is the consequence for my communication with the patient?  
19     To what extent is the sequencing and ordering of our talk being influenced, if at all, by the  
20 demands of the EPR?  
21     Do I need to consider possible alternative ways of managing this situation?

22 How does interacting with the computer affect the standard models of good communication in the  
23 textbooks?  
24  
25

26  
27 **Box 2. Reflective questions based on Cases 2 and 3 which might inform analysis of a student's**  
28 **own video-recorded consultations**  
29

30 Which 'voices' can I identify as being present in this consultation?  
31

32 How do I need to adjust my approach to the consultation when the talk *itself* seems to be the  
33 problem?  
34

35 Am I confident that I correctly understood the patient's problem, in the knowledge that subtle features  
36 such as word stress and styles of self-presentation might differ in speakers whose variety of English is  
37 influenced by a language other than my own? If not, what were the other possible meanings of this  
38 section of talk?  
39

40 How can I ensure that I clarify the patient's intended meanings?

41 Did the strategies that I used to do relational work in the consultation have the desired effect in this  
42 multilingual consultation? (*Examples might include the use of humour, metaphor, or attempts at*  
43 *'informal' conversational styles*) Did I correctly identify the patient's attempts at relational work?  
44

45 This consultation felt muddled and chaotic and did not evolve as I was expecting. Why might this be?  
46 Does my explanation reveal any underlying assumptions about how I understand the act of  
47 consulting, my expectations for the consultation, and my role as the clinician?  
48

49 At what point do I decide I cannot consult effectively without an interpreter either because it is not  
50 clear whether the patient and I have understood each other or because I am concerned that the  
51 patient's voice is being lost?

52 Do the models of patient-centeredness and shared decision-making work when talk itself seems to be  
53 the problem?  
54  
55  
56  
57  
58  
59  
60

**Box 3. Reflective questions based on Case 4 which might inform analysis of a student's own video-recorded consultations**

Which 'voices' can I identify as being present in this consultation?

How and to what extent do I need to re-shape my own communication norms / style to accommodate the specific arrangement of people in this consultation? Do the models of communication in the textbooks need to be adapted in this situation?

How confident am I that this interpreter is doing what they are supposed to do?

When do I notice that the sequence of speakers (doctor, interpreter, patient) is different from that which I might expect?

What may have been the consequences of this disruption to the order of speakers on the understandings of this consultation?

Do I notice occasions when the patient's voice is lost i.e. words of the patient appear to have gone without translation by the interpreter?

Do I notice occasions when my own words appear to have gone without translation by the interpreter?

What can I do to ensure that the interpreter is working to the mutual benefit of the patient and doctor?

## Appendix

### Transcribing conventions

|                       |                                                                                     |       |                                                              |
|-----------------------|-------------------------------------------------------------------------------------|-------|--------------------------------------------------------------|
| [                     | onset of overlapping speech                                                         | .hhh  | in breath                                                    |
| ]                     | end of space of overlapping talk                                                    | =     | no pause between speakers; contiguous utterances             |
| :                     | preceding sounds is lengthened or drawn out<br>(more :: means greater prolongation) | (( )) | non verbal activity / sounds. C indicates keystroke in Fig 1 |
| <u>Underline</u> or * | emphasis                                                                            | .     | falling tone (not necessarily end of sentence)               |
| (.)                   | pause of less than 0.2 seconds                                                      | ?     | Rising inflection (not necessarily a question)               |
| (0.4)                 | pause, in tenths of second                                                          |       |                                                              |
| ↑↓                    | marked rise /fall in intonation                                                     |       |                                                              |
| ° °                   | The talk they surround is quieter than surrounding talk                             |       |                                                              |

# BMJ Open

## Beyond the 'dyad': A qualitative re-evaluation of the changing clinical consultation

|                                 |                                                                                                                                                                                                                                                                                                                                                                                                                      |
|---------------------------------|----------------------------------------------------------------------------------------------------------------------------------------------------------------------------------------------------------------------------------------------------------------------------------------------------------------------------------------------------------------------------------------------------------------------|
| Journal:                        | <i>BMJ Open</i>                                                                                                                                                                                                                                                                                                                                                                                                      |
| Manuscript ID:                  | bmjopen-2014-006017.R1                                                                                                                                                                                                                                                                                                                                                                                               |
| Article Type:                   | Research                                                                                                                                                                                                                                                                                                                                                                                                             |
| Date Submitted by the Author:   | 13-Aug-2014                                                                                                                                                                                                                                                                                                                                                                                                          |
| Complete List of Authors:       | Swinglehurst, Deborah; Barts and The London School of Medicine and Dentistry, Centre for Primary Care and Public Health<br>Roberts, Celia; King's College London, Department of Education and Professional Studies<br>Li, Shuangyu; King's College London, Division of Medicine<br>Weber, Orest; Lausanne University, Psychiatric Liaison Service<br>Singy, Pascal; Lausanne University, Psychiatric Liaison Service |
| <b>Primary Subject Heading</b>: | Qualitative research                                                                                                                                                                                                                                                                                                                                                                                                 |
| Secondary Subject Heading:      | Communication                                                                                                                                                                                                                                                                                                                                                                                                        |
| Keywords:                       | Information technology < BIOTECHNOLOGY & BIOINFORMATICS, MEDICAL EDUCATION & TRAINING, QUALITATIVE RESEARCH                                                                                                                                                                                                                                                                                                          |
|                                 |                                                                                                                                                                                                                                                                                                                                                                                                                      |

SCHOLARONE™  
Manuscripts



# Beyond the 'dyad': A qualitative re-evaluation of the changing clinical consultation.

**Deborah Swinglehurst\***; Celia Roberts; Shuangyu Li; Orest Weber; Pascal Singy

Deborah Swinglehurst is Senior Clinical Lecturer at the Centre for Primary Care and Public Health, Barts and The London School of Medicine and Dentistry, Queen Mary, University of London, UK.

Celia Roberts is Professor of Applied Linguistics in the Department of Education and Professional Studies, King's College London, UK.

Shuangyu Li is Lecturer in Clinical Communication at the Division of Medical Education, School of Medicine, King's College London, UK.

Orest Weber is Researcher at the Psychiatric Liaison Service, Lausanne University Hospital, Lausanne, Switzerland.

Pascal Singy is Associate Professor of Sociolinguistics and Director of Research at the Psychiatric Liaison Service, Lausanne University Hospital, Lausanne, Switzerland.

**\*Corresponding author at:** Centre for Primary Care and Public Health, Barts and The London School of Medicine and Dentistry, Queen Mary, University of London, 58 Turner Street, London E1 2AB, UK. Email: [d.swinglehurst@qmul.ac.uk](mailto:d.swinglehurst@qmul.ac.uk). Telephone +44 20 7882 7204 Fax +44 20 7882 2552

**Keywords:** globalisation; multilingualism; electronic patient record; clinical communication; technology

**Word count: 4323**

**KEYWORDS:** globalisation; multilingualism; electronic patient record; communication skills; technology

## ABSTRACT

### Objective

To identify characteristics of consultations which do not conform to the traditionally understood communication 'dyad', in order to highlight implications for medical education and develop a reflective 'toolkit' for use by medical practitioners and educators in the analysis of consultations.

### Design

A series of interdisciplinary research workshops spanning 12 months explored the social impact of globalisation and computerisation on the clinical consultation, focusing specifically on contemporary challenges to the clinician-patient dyad. Researchers presented detailed case studies of consultations, taken from their recent research projects. Drawing on concepts from applied sociolinguistics, further analysis of selected case studies prompted the identification of key emergent themes.

### Setting

University departments in the UK and Switzerland.

### Participants

Six researchers with backgrounds in medicine, applied linguistics, sociolinguistics and medical education. One workshop was also attended by PhD students conducting research on healthcare interactions.

## Results

The contemporary consultation is characterised by a multiplicity of voices. Incorporation of additional voices in the consultation creates new forms of order (and *dis-order*) in the interaction. The roles 'clinician' and 'patient' are blurred as they become increasingly distributed between different participants. These new consultation arrangements make new demands on clinicians which lie beyond the scope of most educational programmes for clinical communication.

## Conclusion

The consultation is changing. Traditional consultation models which assume a 'dyadic' consultation do not adequately incorporate the realities of many contemporary consultations. A paradox emerges between the need to manage consultations in a 'super-diverse' multilingual society, whilst also attending to increasing requirements for standardised protocol-driven approaches to care prompted by computer use. The tension between standardisation and flexibility requires addressing in educational contexts. Drawing on concepts from applied sociolinguistics and the findings of these research observations, the authors offer a reflective 'toolkit' of questions to ask of the consultation in the context of enquiry based learning.

**(300 words)**

## ARTICLE SUMMARY

### Strengths and limitations of this study

- Brings insights from applied sociolinguistics to the analysis of consultations, including detailed interactional transcription and analytic concepts. These may be unfamiliar to some readers and we recognise it is not easy to make them accessible
- Addresses the mismatch between consultations as conceptualised in communication models and the reality of many contemporary consultations
- Offers a research-informed output, a 'reflective toolkit', for use in practice by clinicians and educators
- Focuses on issues relevant to a globalised, technology-driven world, but does not address all types of consultation which breach the communication dyad (e.g. clinician - patient - carer)

## INTRODUCTION

Two of the most significant changes affecting communication in the consultation are the increasing use of computers (the 'technologisation' of care)(1) and globalisation. The use of electronic patient records (EPRs) is gathering pace throughout Europe with the UK, the Netherlands and Scandinavia leading the way. (2-4) Globalisation (the movement of people, their languages, cultural practices, artefacts and 'norms' between countries) is creating 'super-diverse' multilingual populations.(5) According to the 2011 census in England and Wales, 29% of the population were born abroad or have a parent or grandparent born abroad. In Switzerland, 35.1% of over-15s are first- or second-generation migrants.(6) These social changes have significant impacts on the consultation.

Researchers of electronic patient records have coined the term 'triadic' consultation to highlight the computer as an influential third party in the consultation.(7-10) Swinglehurst et al. go further, conceptualising the EPR as bringing a wide range of competing voices to the consultation and shaping its dynamics.(11;12) Likewise, the dynamics of multilingual consultations are changed by the inclusion of professional and *ad hoc* interpreters (untrained family members, staff or volunteers). The resulting configuration has been referred to as a 'trialogue'.(13-18) An increasing number of consultations involve patients (and doctors) communicating in a language other than their first language, or in a variety of the majority language (e.g. English) influenced by their first language. In these consultations the communication barrier may lead to a 'loss' of patient voice (examples 2 and 3 in this paper) or to unresolved misunderstandings arising from subtle differences in speech delivery, word stress and styles of self-presentation. (19)

1  
2  
3 Consultations which incorporate socio-technical or sociolinguistic challenges (or  
4 both) are increasingly the norm in large urban areas. Although medical educators  
5 recognise that consultations are growing in complexity,(20) educational resources  
6 addressing these complexities remain limited. Current consultation models assume a  
7 communication 'dyad' in which two voices (patient and clinician) engage in focussed  
8 interaction using broadly shared ways of communicating. Communication tends to be  
9 envisaged as a series of learned prototypical 'skills' or procedures for accomplishing  
10 clinical tasks rather than as a dynamic interaction which emerges moment-by-  
11 moment, shaped by every interactional nuance along the way. Assumptions about  
12 the nature of communication are reflected in strategies currently advocated for  
13 interpreted consultations such as: advising the interpreter what is expected up front;  
14 explaining the interpreter's role to the patient; allowing ample time; asking one  
15 question at a time; clarifying confusing responses; seeking 'cultural information' from  
16 the interpreter afterwards.(17;21-23) Likewise, in computer mediated consultations  
17 doctors are advised to avoid trying to attend to patient and computer at the same  
18 time (e.g. by 'signposting' computer use), to use mobile monitors and to 'look at the  
19 patient'.(8;24) Although these suggestions are useful, they overlook the fact that the  
20 interaction is itself fundamentally and profoundly changed by these new  
21 arrangements.

22  
23  
24  
25  
26  
27  
28  
29  
30  
31  
32  
33  
34  
35  
36  
37  
38  
39  
40  
41  
42  
43  
44  
45  
46 This paper explores the characteristics of these contemporary consultations through  
47 presentation of case studies selected as 'telling cases' (25) highlighting the  
48 challenges arising in consultations which involve a meeting of more than two voices.  
49 Analytic observations are developed into a reflective 'toolkit' for use in the  
50 educational context while analysing learners' video-recorded consultations. For  
51  
52  
53  
54  
55  
56  
57  
58  
59  
60

1  
2  
3 readers who may be unfamiliar with sociolinguistic concepts presented in this paper  
4  
5 we include a list of definitions in **Box 1**.  
6  
7  
8  
9

## 10 11 **METHODS**

12  
13  
14 A series of interdisciplinary workshops was held over a 12- month period bringing  
15 together academics specialising in healthcare communication. Their disciplinary  
16 backgrounds spanned medicine, applied linguistics, sociolinguistics and medical  
17 education. Case study presentations were followed by discussion, leading to further  
18 analysis of primary interactional data. The case studies were selected from four  
19 ethnographic/sociolinguistic research projects drawing on theme-orientated  
20 discourse analysis (26), conversation analysis (27) and linguistic ethnography (28).  
21 The research projects had received ethical approval (Thames Valley multi-centre  
22 REC 06/MRE12/81; NHS Bradford REC 09/H1302/106; REC of Vaud, Switzerland  
23 271/07; St. Thomas' Hospital local REC).  
24  
25  
26  
27  
28  
29  
30  
31  
32  
33  
34  
35  
36

37 The selection of case studies was informed by case study methodology and based  
38 on a key ethnographic principle, that of 'developing theory through the study of  
39 critical cases' (page 20) (29). The workshops drew on Mitchell's concept of a 'telling'  
40 case study 'in which the particular circumstances surrounding a case serve to make  
41 previously obscure theoretical relationships apparent' (page 239) (25).  
42  
43  
44  
45  
46  
47  
48

49 So, telling cases from the four research projects were selected as examples of  
50 consultations which breach the clinician-patient 'dyad', incorporating additional  
51 'voices'. The authors worked together to identify synergies across them, teasing out  
52 themes and valid connections between events and phenomena relevant to medical  
53  
54  
55  
56  
57  
58  
59  
60

1  
2  
3 education. Case studies explored the following: the interactional structure of general  
4 practitioners' (GP) consultations involving interpreters; the shaping influence of the  
5 EPR in primary care consultations; consultations involving patients communicating in  
6 a language other than their first language. The nature of the additional 'voices' in the  
7 latter example may not be immediately apparent, but relates to socio-cultural scripts  
8 originating *beyond* the consultation and informing notions of how to present oneself,  
9 ideas about the self (and the clinician), one's relationship to authority, expectations  
10 of the healthcare system, for example. Although there is an extensive literature on  
11 cultural health beliefs, precisely how patients present themselves, how they voice  
12 their concerns and the impact of differences in linguistic background on the  
13 orderliness and distribution of knowledge and expertise have been much less  
14 studied.

## 30 RESULTS

31  
32 We identified two key interrelated themes which are the main focus of this article:  
33 *orderliness* and *distribution*. We will begin by introducing these themes and will then  
34 present some short extracts of data analysis illustrating how these themes play out in  
35 the contemporary consultation and how they disrupt the dyadic nature of the  
36 consultation.

### 45 'Orderliness' in the contemporary consultation

46  
47 The 'orderliness' of the consultation has been the subject of much previous research.  
48 Medical educators will be familiar with the stages of the consultation described by  
49 Byrne and Long in 1976,(30) and with more detailed models (e.g. Calgary-  
50 Cambridge) which are currently favoured within educational curricula.(31) These  
51 models describe the consultation in more-or-less discrete phases such as 'gathering  
52  
53  
54  
55  
56  
57  
58  
59  
60



1  
2  
3 information' and 'explanation and planning'. Each stage is associated with a set of  
4  
5 skills which underpin formative and summative assessments of medical students and  
6  
7 some professional licensing examinations (e.g. the UK Clinical Skills Assessment  
8  
9 forms part of the licensing examination for general practitioners).  
10

11  
12 Apart from the assumption that the consultation, with its various 'phases', is an  
13  
14 orderly affair, these models tend to assume a structuralist orientation to language,  
15  
16 that is, the talk shared between clinician and patient is assumed to represent  
17  
18 particular meanings – talk is simply *representative* of reality. For example, when a  
19  
20 clinician 'summarises' the consultation, this summary is assumed to reflect a concise  
21  
22 version of the patient's story, which is in turn assumed to represent the patient's  
23  
24 experience. An alternative *social constructionist* perspective would also consider the  
25  
26 additional work being *accomplished* by summarising – for example: the clinician's  
27  
28 opportunity to take back the 'speaking floor';(32) the organisation of the story; the  
29  
30 emphasis afforded to those aspects perceived to be most salient to diagnostic  
31  
32 reasoning or clinical management; the clinician's construction of their professional  
33  
34 identity. From this perspective the encounter is relatively unstable, and the  
35  
36 orderliness of the consultation, or its identified 'phases' are not so much inevitable  
37  
38 *attributes* of the consultation, but are 'brought about' or 'worked up' through  
39  
40 interaction. This 'bringing about' is informed by previous cumulative experience of  
41  
42 what usually happens in the kind of interaction we recognize as a 'medical  
43  
44 consultation', but involves a certain amount of improvisation along the way.  
45  
46  
47  
48  
49

### 50 51 **'Distribution' in the contemporary consultation**

52  
53  
54 In consultations that lie beyond the 'dyad' by inclusion of additional people (e.g.  
55  
56 interpreters) or technologies (e.g. electronic patient records) or patients whose first  
57  
58  
59  
60

1  
2  
3 language is not English, we face new configurations in terms of the distribution of  
4  
5 knowledge, power, authority and social identities. In what has been called the  
6  
7 “crowded” consultation(33) where many voices meet, new questions become salient  
8  
9 and contested. For example: *Who is doing the talking? Whose voice is heard? How*  
10  
11 *is knowledge distributed? What is important medical knowledge? Whose interests*  
12  
13 *are being served? Who is the patient? Who is the clinician?*

### 14 15 16 17 **Analysis of ‘orderliness’ and ‘distribution’ of roles in the contemporary** 18 19 **consultation**

20  
21  
22 In this section we will illustrate how ‘orderliness’ and ‘distribution’ play out in  
23  
24 consultations which breach the communication dyad, using selected data extracts.  
25  
26 These examples combine the micro-analytic methods used in conversation analysis  
27  
28 (CA) with ethnographic observation of the relevant institutional contexts, mindful that  
29  
30 this broader context shapes interaction in important ways. CA considers the detailed  
31  
32 systematic patterns and regularities that arise as each speaker takes up, interprets  
33  
34 and responds to the other’s turn.(34;35) Our case studies show how the well-  
35  
36 described orderliness of the consultation becomes disturbed when additional voices  
37  
38 are introduced, as new forms of order and dis-order emerge and care becomes  
39  
40 increasingly distributed. We have retained the transcribing conventions used in each  
41  
42 original study (see Appendix). The text is interspersed with suggestions of reflective  
43  
44 questions which emerge from our data analysis. We anticipate that these questions  
45  
46 will encourage tutors and learners to discover the importance of considering the  
47  
48 consultation as an emergent *co-constructed* phenomenon, requiring a degree of  
49  
50 improvisation. They are intended for use by tutors in undergraduate and  
51  
52 postgraduate contexts (e.g. general practice (GP) training) when teaching clinical  
53  
54 communication and also by learners as they play back and reflect on their own  
55  
56  
57  
58  
59  
60

1  
2  
3 video-recorded consultations, sensitising them to particular challenges posed in these  
4  
5 complex consultations and extending the range of available tools for critical analysis.  
6  
7 Their value may be enhanced by educational support from a sociolinguist or a more  
8  
9 collaborative interdisciplinary pedagogy which brings together clinicians and  
10  
11 linguists. .  
12

13  
14  
15 First, we look at the opening of a consultation between a nurse (N) and patient (P),  
16  
17 English speakers who haven't met before (**Figure 1**). The institutional context is an  
18  
19 annual asthma check, a requirement of the UK Quality and Outcomes Framework  
20  
21 (QOF) for which incentive payments are made. The nurse is completing a computer  
22  
23 template (form) during the consultation. The transcript includes notes on bodily  
24  
25 conduct and the computer screen display.  
26  
27

28  
29 <<INSERT FIGURE 1 ABOUT HERE>>  
30

31  
32 She frames the consultation as an 'assessment' emphasising it is really (01:08) or  
33  
34 very (01:19) straightforward. The linearity of the upcoming consultation is alluded to  
35  
36 as she counts a 3-part list with her fingers. She demarcates the purpose of the clinic,  
37  
38 laying it out as an orderly affair and (implicitly) setting limits on what can happen.  
39  
40 She adds to this later (at 2:09, transcript not shown), while gesturing towards the  
41  
42 EPR: *"What I've got here is some questions that I – I need to ask you. They're fairly  
43  
44 straightforward ones but what they tend to do with is that they will flag up whether  
45  
46 there >actually< we have got what w- what I would call breakthrough symptoms."*  
47  
48 Reiterating that it is 'straightforward', the phrase *"I need to ask you"* points to an  
49  
50 underlying institutional requirement. Reassurance focuses on an anticipated  
51  
52 orderliness of the clinic, dealing up front with any misalignment between what the  
53  
54 patient may expect and what the nurse is required to do. But this is a different kind of  
55  
56  
57  
58  
59  
60

1  
2  
3 order to that which we might expect. This is an orderliness in which the electronic  
4  
5 template is instrumental, rather than one which emerges through dialogue between  
6  
7 clinician and patient.(12)  
8  
9

10  
11 The nurse then goes on to speak *not* of symptoms, but of inhalers (transcript  
12  
13 omitted) and then smoking. Here the template introduces a topic (smoking) which  
14  
15 seems tangential to this patient's particular circumstances, although it is important to  
16  
17 asthma care in general terms, and has institutional significance, being a QOF  
18  
19 indicator. The EPR thus brings an institutional voice into the encounter, making  
20  
21 relevant the patient's identity as a lifelong non-smoker in this context. It contributes  
22  
23 to defining what is important medical knowledge, reproducing particular definitions of  
24  
25 'quality' in practice - gathering data about (non-)smoking for QOF being an example.  
26  
27 The patient becomes an epidemiological informant and 'quality' is transformed into  
28  
29 meeting an institutional requirement rather than focussing on the specific quality of  
30  
31 care of the individual. At 2.50 - 2.52 the nurse's emphatic evaluations "*excellent,*  
32  
33 *that's great*" are spoken towards the EPR as she types, apparently referring to her  
34  
35 satisfaction at meeting its demands, the patient watching from the sidelines. At the  
36  
37 very least it is ambiguous to whom (or what) these superlatives relate.  
38  
39  
40  
41

42  
43 The analytic question of "*Who is doing the talking?*" is at issue here. For example,  
44  
45 the authorship of the words at 2:47 is apparently distributed between the nurse and  
46  
47 the EPR. We see a disruption of the usual conventions of conversation, with this  
48  
49 comment spoken by the nurse as she looks at the computer screen rather than at  
50  
51 the patient to whom she expects to hand over the speaking 'turn'. The nurse's  
52  
53 attention is divided between what has been called the patient *embodied* and the  
54  
55 patient *inscribed* (36;37) as the patient becomes (metaphorically) distributed  
56  
57 between person and record.(36) The nurse is *cognitively* oriented to the patient as  
58  
59  
60

1  
2  
3 she establishes his smoking status by looking at the EPR, but the *affective* aspect of  
4 her involvement - which Goffman has highlighted as crucial in a social interaction -  
5 is compromised.(38) This “template talk” is met by a 0.4 second pause. The nurse  
6 then turns to face the patient, adding “*that’s what I’ve got here*” - this time evoking a  
7 response, as they jointly repeat “*never smoked*”, words which were initially displayed  
8 on the EPR screen (visible only to the nurse).  
9  
10  
11  
12  
13  
14  
15  
16

17 **Box 2** suggests some reflective questions to ask of consultations involving the EPR.  
18 Students may find it helpful to use the transcript in Figure 1 to gain familiarity with  
19 these questions before asking the same questions of their own video-recorded  
20 consultations. In the following sections, we incorporate reflective questions arising  
21 from our data analysis as applicable to different kinds of complex consultations.  
22  
23  
24  
25  
26  
27  
28

29 <<INSERT BOX 2 ABOUT HERE>>  
30  
31

32 Our next example (**Figure 2**) is from a GP consultation with a patient from Nigeria  
33 who speaks a variety of English that differs from local English. Whilst on holiday in  
34 Nigeria he was bitten by a dog, raising the question of whether he might have been  
35 exposed to rabies (lines 1-4) and considered for vaccination.  
36  
37  
38  
39  
40  
41

42 <<INSERT FIGURE 2 ABOUT HERE>>  
43  
44

45 This example illustrates an unresolved ambiguity which arises from different  
46 conventions in standard English and Nigerian English over the use of contrastive  
47 stress (indicated by \* in data). Disorder, misunderstanding, and an incorrect  
48 assessment ensue. In lines 4-7 the patient tells the GP he knows the dog’s owner  
49 and that the dog visits the vet regularly. This reassures the GP that the patient is at  
50 low risk (line 12: “*oh fair enough*”) and he in turn later reassures the patient that no  
51  
52  
53  
54  
55  
56  
57  
58  
59  
60

1  
2  
3 vaccination is needed. In fact the patient was conveying his concern that the dog  
4 may **not** be free of rabies, and that the owner could not be trusted. When the patient  
5 says "***they** told me the dog go to the vet regular but that's **what** they said*" (lines  
6,7,9, highlighted in bold in transcript) he emphasizes the agent (*'they'*) and the  
7 content of the agent's talk (*"what"*). The equivalent sentiment in standard English  
8 would be "*they told me the dog goes to the vet regular, but that's what they said*" with  
9 the emphasis on the verbs ("told", "said"). Although the patient offers further hints of  
10 his scepticism in line 13 - a hesitation, laughter and the word "but" – the underlying  
11 ambiguity is passed over, and absent from the institutional record made by the  
12 doctor. Misunderstandings, or the illusion of understanding, which result from small  
13 and subliminally processed differences in talk, are more frequent in a multi-lingual  
14 patient population(19) and challenge conventional orderliness. But no simple  
15 behaviours can be taught in situations of super-diversity as our next two examples  
16 also show.  
17  
18  
19  
20  
21  
22  
23  
24  
25  
26  
27  
28  
29  
30  
31  
32  
33  
34

35 **Figure 3** shows an extract of a video-recorded consultation in a Swiss pain clinic  
36 (translated from French) in which consent is sought for a spinal injection. The patient  
37 left his home country 10 years earlier after a war, and has very limited command of  
38 French. He has chronic low back pain for which he has received spinal injections. He  
39 is worried about the risks involved, because a previous consent form (translated by  
40 his daughter) referred to a risk of paralysis.  
41  
42  
43  
44  
45  
46  
47  
48

49 <<INSERT FIGURE 3 ABOUT HERE>>  
50

51  
52 As in the previous example, there is obvious asymmetry of the linguistic resources  
53 available. Indeed the entire extract might be regarded as a continuous, extended and  
54 only partly repaired misunderstanding. Both parties struggle to grasp at least some  
55  
56  
57  
58  
59  
60

1  
2  
3 meaning in the words of the other. An interview with both interactants afterwards  
4  
5 (data not shown) suggested that some areas of shared understanding were reached:  
6  
7 the patient's fear of the injection, the positive impact of a previous injection and  
8  
9 agreement to proceed today. But other communicative efforts failed, including the  
10  
11 doctor's attempt to reassure the patient that paralysis does not happen often.  
12  
13 Indeed, the patient reported that the doctor had particularly reminded him of the risks  
14  
15 of paralysis adding that he, the patient, had to take responsibility for this risk. The  
16  
17 patient's fear (linked it appears to some past experience in the war) is not explored.  
18  
19 Arguably under conditions of such scarce common linguistic means this topic may be  
20  
21 deemed too complex to tackle; the patient's voice from the past is lost.  
22  
23  
24  
25

26 Difficulties arising in the clinical decision-making process have previously been  
27  
28 described in monolingual contexts,(39;40) but they become magnified when patients  
29  
30 have limited proficiency in the language of consultation. In this multilingual context  
31  
32 the ideals of shared decision-making within an ordered consultation are eroded. In  
33  
34 this example, the doctor first presents his idea, tries to convince the patient of the  
35  
36 benefits of another injection and goes on to investigate the patient's worries and  
37  
38 possible reasons for disagreement. But the participants fail to connect the discursive  
39  
40 threads of this discussion to the final decision. Patient consent follows immediately  
41  
42 after major interactional troubles, culminating in a self-critical meta-communicative  
43  
44 account by the patient (*"I don't know how to explain well"*) and an abrupt topic shift  
45  
46 by the doctor. The doctor appears to cut to the decision making when he gives up on  
47  
48 achieving further clarity about the patient's stance.  
49  
50  
51  
52

53 **Box 3** presents some reflective questions to ask of consultations which involve  
54  
55 patients who have either a limited command of the dominant language of the  
56  
57 consultation, or speak a non-local variety of the dominant language (such as those  
58  
59  
60

1  
2  
3 illustrated in **Figures 2 and 3**). These questions are intended to inform analysis of  
4  
5 students' own video recorded consultations.  
6  
7

8 << INSERT BOX 3 >>  
9

10  
11 Consultations like those in **Figures 2 and 3** in which the clinician and patient are not  
12  
13 'in tune' with each other require considerable and not always successful  
14  
15 collaborative work by both parties to prevent, recognise and repair  
16  
17 misunderstandings.(41) The use of interpreters may address these issues to some  
18  
19 extent, but not without introducing different challenges. The work of consulting  
20  
21 becomes distributed between at least three participants, changing the relationship of  
22  
23 the speakers to their own words and so disturbing roles and identities. The  
24  
25 orderliness in interpreted consultations is changed, both in terms of overall structure  
26  
27 and in micro-interactional patterns. Clinicians have to do more than simply establish  
28  
29 consensus on the mode of communication and the role of the interpreter as  
30  
31 suggested by recent guidelines.(16;17) At the micro-level, extra verbal exchanges  
32  
33 are required to clarify misunderstandings (as we saw in Figures 2 & 3). The  
34  
35 traditional doctor↔patient (dyadic) interactional sequence becomes a more  
36  
37 complicated 'triadic' pattern. Close inspection of interpreted consultations shows that  
38  
39 this assumed prototypical triadic sequence (doctor→interpreter→patient or  
40  
41 patient→interpreter→doctor) is not always observed by participants, so that one or  
42  
43 more participants' voices are 'lost'.(16;42) The power to decide who talks next is  
44  
45 *unequally* distributed among the three participants – with patients at the bottom of  
46  
47 the hierarchy. Even when the prototypical doctor-interpreter-patient sequence *is*  
48  
49 followed, there remains considerable scope for misunderstanding, due to ambiguity  
50  
51 over interpreter's role and how the interpreting task is actually done in practice. The  
52  
53 interpreter delivers a 'hybrid' voice which incorporates the voices of all three  
54  
55  
56  
57  
58  
59  
60



1  
2  
3 participants in the interaction. **Figure 4** shows an extract from an interpreted  
4 consultation in England with a Czech-speaking patient who has complained of  
5 headaches. It gives some insight into how the themes of orderliness and distribution  
6 play out in an interpreted consultation. A related set of reflective questions which  
7 may be useful to students as they analyse their own interpreter-mediated  
8 consultations is provided in **Box 4**.  
9  
10  
11  
12  
13  
14  
15

16  
17 <<INSERT FIGURE 4 ABOUT HERE>>  
18

19  
20 From lines 1 to 10, the participants follow the triadic sequence in their turn-taking.  
21 However, what the doctor and patient hear is reformulated by the interpreter. In Line  
22 1, the doctor asks a question. Prior to the question he refers to an earlier discussion  
23 about the patient's pain, signposting a change of topic. However, this signposting is  
24 omitted by the interpreter in Lines 3-4. Similarly, in Lines 5-7 the interpreter adds  
25 'that start afternoon' into her translation although the patient did not say these words  
26 here. As Bolden points out, an interpreter is constantly choosing the quantity and  
27 quality of information that is translated, thus creating a hybrid voice and assigning  
28 themselves an extra role as either 'doctor' or 'patient' with blurring of the usual  
29 boundaries between the two.(43) The potential for voices to become 'lost' in this  
30 process is greatest when the prototypical triadic sequence is not followed.  
31  
32  
33  
34  
35  
36  
37  
38  
39  
40  
41  
42  
43  
44

45 At line 10, the doctor comments on the interpreter's response ("*Interesting. That's*  
46 *good*"). If the (assumed) triadic sequence was followed, one would expect either that  
47 the doctor would continue talking at this point, or that he would pass the speaking  
48 turn to the interpreter to translate his words. Either way, we would not expect the  
49 patient to have a turn here. However, the patient (line 11) brings in a new topic,  
50 ostensibly in an 'inappropriate' place. Her utterance is not translated and goes  
51  
52  
53  
54  
55  
56  
57  
58  
59  
60

1  
2  
3 unheard as the doctor interrupts the patient (line 13) before she can finish her talk;  
4  
5 this marks the patient's entry as 'not legitimate'. The doctor and the interpreter then  
6  
7 continue the conversation following the triadic sequence. In the wider dataset from  
8  
9 which this extract is taken, we found that doctors also speak at such 'inappropriate  
10  
11 places'. However there is a difference. In most cases, the words of the doctor *are*  
12  
13 translated, and the patient is put 'on hold' while this is done. In other words, when  
14  
15 the prototypical doctor-interpreter-patient sequence breaks down it is the *interpreter*  
16  
17 who takes on the role of 'distributor' of speaking turns and decides whose voice will  
18  
19 be preferentially heard. In our dataset, interpreters tended to prioritise the doctor's  
20  
21 right to speak, as illustrated in **Figure 4**.  
22  
23

24  
25  
26 << INSERT BOX 4 ABOUT HERE >>  
27  
28  
29  
30  
31

## 32 DISCUSSION

33  
34  
35 Rapid technological and demographic change has brought challenges to the  
36  
37 consultation which were not anticipated when the consultation models currently  
38  
39 taught to students were developed. Using a selection of 'telling' cases as a basis for  
40  
41 analysis we have been able to develop novel conceptual ideas about the  
42  
43 contemporary consultation which challenge normative assumptions, showing that the  
44  
45 notion of the consultation as a dyadic meeting of two speakers who share  
46  
47 communicative resources is frequently challenged. Our priority has been on depth of  
48  
49 analysis rather than breadth, with our selection of case studies informed by the  
50  
51 'opportunity to learn' rather than by concerns around 'typicality'.(44) Based on a  
52  
53 detailed study of four contrasting cases we suggest there are complex new  
54  
55 configurations of voices in the consultation, and - as a consequence of this - the  
56  
57  
58  
59  
60

1  
2  
3 potential for 'losing' the patient voice. These challenges to the 'dyadic' consultation  
4 rarely receive explicit attention in the educational curriculum. One striking  
5 observation which emerges from our data is that the twin social pressures of  
6 globalisation and technologisation appear to place paradoxically opposing demands  
7 on the consultation. On the one hand, clinicians are challenged with increasingly  
8 diverse, unpredictable consultations from a sociolinguistic perspective, requiring  
9 flexibility and a tolerance of ambiguity. On the other, there is increasing pressure to  
10 'standardise' practices, for example through greater use of EPR templates.  
11  
12  
13  
14  
15  
16  
17  
18  
19

20  
21 Building on our analysis of these case studies we have offered a series of reflective  
22 questions which may be relevant to ask of complex consultations which take on  
23 these new kinds of orderliness and in which conventional understandings of the roles  
24 of clinician and patient become blurred. These questions have not yet been tested  
25 empirically in an educational setting and do not constitute a definitive checklist. They  
26 may neither be relevant to all consultations nor necessarily comprehensive, but we  
27 hope that they are a starting point to promote observation and discussion about the  
28 consultation from an orientation which embraces its new complexities. Further  
29 empirical research is required to test the value of this toolkit as an educational  
30 intervention in practice and to refine it in the context of further educational research.  
31  
32  
33  
34  
35  
36  
37  
38  
39  
40  
41  
42  
43

44 We would like to invite debate amongst medical educators about how to adapt,  
45 extend or revise consultation models to ensure that these important aspects of the  
46 contemporary consultation do not remain overlooked. We suggest that an orientation  
47 to the consultation as a dynamic process which is co-constructed between clinician  
48 and patient is helpful, one in which the structure (we prefer 'orderliness') emerges  
49 out of the collaborative work of clinician and patient (and others) and which depends  
50 on how the 'work' of consulting is distributed between participants. Regarding the  
51  
52  
53  
54  
55  
56  
57  
58  
59  
60

1  
2  
3 consultation as a co-construction demands more than a range of 'add-on' prompts  
4  
5 describing specific clinician behaviours. It encompasses a shift away from the idea  
6  
7 that consulting is a set of competences to be mastered, towards a more analytical  
8  
9 orientation. The most important overarching question to ask of the consultation shifts  
10  
11 from "Did I do that well?" towards "What did we accomplish there?" This brings the  
12  
13 contribution of the patient, and all relevant parties (or 'voices') into clearer view. The  
14  
15 questions we offer to learners within our reflective 'toolkit' in this paper fall broadly  
16  
17 within this overarching question.  
18  
19

20  
21 We urge educators to consider critically how their approach to teaching clinical  
22  
23 communication might change if instead of assuming that the talk *represents* some  
24  
25 kind of existing reality they also encourage students to consider conceptualising talk  
26  
27 as *constructing* reality, an assumption which underpins this paper. We suggest that  
28  
29 greater use of the detailed analysis of video-recordings of real (as opposed to  
30  
31 simulated) consultations may be helpful, exposing learners - as consulters and  
32  
33 critical observers - to the kinds of complexities that our research highlights. For  
34  
35 example, a DVD by Roberts et al. entitled "*Doing the Lambeth Talk*" shows how  
36  
37 misunderstandings in the multilingual consultation can be avoided and repaired.  
38  
39  
40  
41  
42  
43  
44  
45  
46  
47  
48  
49  
50  
51  
52  
53  
54  
55  
56  
57  
58  
59  
60

**Box 1. Definitions****Voice**

Drawing on social theory 'voice' has both literal and metaphorical meanings. It is used literally as the human voice i.e. the sound of the voice and the manner in which someone speaks. 'Voice' is used metaphorically a) in writing, to identify the distinctive style and authority that a text has e.g. the EPR b) in speech and writing, as multiple or hybrid voices, when different styles are conflated together or a dominant style is infused with a less noticed one.

**Dyad and Triad**

'Dyad' is the traditional one-to-one communication between two people (here the clinician and patient) which is seen as the norm. A 'triad' is an interaction of three people or voices. Here the conventional two person communication is disturbed and its norms are challenged.

**Misalignment**

'Misalignments' are uncomfortable or inappropriate moments or instances where one side has difficulty interpreting the assumptions of the other. They are also moments when the speakers appear to be on parallel tracks, not responding fully to the other.

**Agent**

'Agent' is a term used in grammar analysis to describe the person or thing in the sentence that is the main subject doing the action

**Repair**

'Repair' is used metaphorically to describe how misunderstandings and misalignments in interaction are dealt with. It often involves talking *about* talk, to sort the interactional problem out.

**Social constructionism**

An approach that assumes that reality is the result of historical, social and political processes, in which the interest of the researcher is in how phenomena come into being, the processes by which they come to be 'constructed' as they are.

**Box 2. Reflective questions based on Case 1 which might inform analysis of a student's own video-recorded consultations**

Which 'voices' can I identify as being present in this consultation?

Which voices are being privileged at different times in the consultation and why?

What is the consequence of this?

How do I ensure that the patient's voice is not lost?

How and to what extent do I need to re-shape my own communication norms / style to accommodate the specific arrangement of people and computer in this consultation?

How, and to what extent am I fully 'involved' in this consultation?

What does this mean to me and what challenge is this particular consultation presenting?

To whom and what am I attending, and with what purpose?

How am I incorporating computer templates and prompts?

What is the consequence for my communication with the patient?

To what extent is the sequencing and ordering of our talk being influenced, if at all, by the demands of the EPR?

Do I need to consider possible alternative ways of managing this situation?

How does interacting with the computer affect the standard models of good communication in the textbooks?

**Box 3. Reflective questions based on Cases 2 and 3 which might inform analysis of a student's own video-recorded consultations**

Which 'voices' can I identify as being present in this consultation?

How do I need to adjust my approach to the consultation when the talk *itself* seems to be the problem?

Am I confident that I correctly understood the patient's problem, in the knowledge that subtle features such as word stress and styles of self-presentation might differ in speakers whose variety of English is influenced by a language other than my own? If not, what were the other possible meanings of this section of talk?

How can I ensure that I clarify the patient's intended meanings?

Did the strategies that I used to do relational work in the consultation have the desired effect in this multilingual consultation? (*Examples might include the use of humour, metaphor, or attempts at 'informal' conversational styles*) Did I correctly identify the patient's attempts at relational work?

This consultation felt muddled and chaotic and did not evolve as I was expecting. Why might this be? Does my explanation reveal any underlying assumptions about how I understand the act of consulting, my expectations for the consultation, and my role as the clinician?

At what point do I decide I cannot consult effectively without an interpreter either because it is not clear whether the patient and I have understood each other or because I am concerned that the patient's voice is being lost?

Do the models of patient-centeredness and shared decision-making work when talk itself seems to be the problem?

**Box 4. Reflective questions based on Case 4 which might inform analysis of a student's own video-recorded consultations**

Which 'voices' can I identify as being present in this consultation?

How and to what extent do I need to re-shape my own communication norms / style to accommodate the specific arrangement of people in this consultation? Do the models of communication in the textbooks need to be adapted in this situation?

How confident am I that this interpreter is doing what they are supposed to do?

When do I notice that the sequence of speakers (doctor, interpreter, patient) is different from that which I might expect?

What may have been the consequences of this disruption to the order of speakers on the understandings of this consultation?

Do I notice occasions when the patient's voice is lost i.e. words of the patient appear to have gone without translation by the interpreter?

Do I notice occasions when my own words appear to have gone without translation by the interpreter?

What can I do to ensure that the interpreter is working to the mutual benefit of the patient and doctor?

## ACKNOWLEDGMENTS

The authors would like to thank the staff and patients who agreed to take part in the four original research projects from which the data presented in this article are selected. We would also like to thank our peer reviewers for helpful comments on the manuscript.

## COMPETING INTERESTS

None declared

## FUNDING

The research projects on which this paper is based were funded by: National Institute for Health Research Doctoral Fellowship and Medical Research Council (MRC) (DS); Sir Sigmund Warburg Voluntary Settlement (CR); NHS Bradford & Airedale PhD Fellowship (SL); Swiss National Science Foundation (OW and PS).

## CONTRIBUTORSHIP STATEMENT

All of the authors of this paper fulfil ICMJE guidelines for authorship. All authors were involved in data collection and analysis. All authors participated in the preparation and presentation of case studies (drawn from their own empirical research) in the research workshops and in subsequent re-analysis of case study data to identify emergent cross-cutting themes. DS and CR took responsibility for developing the analysis into practitioner-relevant resources, refining these in discussion with SL, OW and PS. DS wrote the first draft of the paper and revised it in response to critical commentary from all of the remaining authors (CR, SL, OW, PS). All authors have approved the final version of the manuscript.

## DATA SHARING

No additional data available.

## FIGURE LEGENDS

Figure 1. New forms of order and the distribution of authorship in the asthma clinic

Figure 2. Dis-order arising from different conventions in intonation

Figure 3. Negotiating consent for a spinal injection

Figure 4 Lost voices in distributed turn-taking sequence organisation (English translation in italics)

## Reference List

- (1) Peacock JW, Nolan PW. Care under threat in the modern world. *Journal of Advanced Nursing* 2000;32:1066-70.
- (2) Knottnerus JA. The Role of the Electronic Patient Record in the Development of General Practice in the Netherlands. *Methods of Information in Medicine* 1999;38:350-4.
- (3) Protti D, Johansen I. Widespread Adoption of Informtion Technology in Primary Care Physician Offices in Denmark: A Case Study. Downloadable from [http://www.commonwealthfund.org/~media/Files/Publications/Issue%20Brief/2010/Mar/1379\\_Protti\\_widespread\\_adoption\\_IT\\_primary\\_care\\_Denmark\\_intl\\_ib.pdf](http://www.commonwealthfund.org/~media/Files/Publications/Issue%20Brief/2010/Mar/1379_Protti_widespread_adoption_IT_primary_care_Denmark_intl_ib.pdf). The Commonwealth Fund; 2010.
- (4) RCGP. Information Management and Technology in General Practice: RCGP Information Sheet No.7. 2005.
- (5) Vertovec S. Super-diversity and its implications. *Ethnic and Racial Studies* 2007;30:1024-54.
- (6) Office fédéral de la statistique. Relevé structurel du recensement fédéral de la population selon la langue et la religion. Available from: <http://www.bfs.admin.ch/bfs/portal/fr/index/news/02/03/02.html>. 2013.
- (7) Scott D, Purves I. Triadic relationship between doctor, computer and patient. *Interacting with Computers* 1996;8(4):347-63.
- (8) Ventres W, Kooienga S, Marlin R. EHRs in the Exam Room: Tips on Patient-Centred Care. *Family Practice Management* 2006;13(3):45-7.



- 1  
2  
3 (9) Margalit RS, Roter D, Dunevant MA, et al. Electronic medical record use and physician-patient communication: An observational study of Israeli primary care encounters. *Patient Education and Counseling* 2006 Apr;61(1):134-41.
- 4  
5  
6  
7 (10) Pearce C. *Doctors, Patients and Computers, the New Consultation*. PhD Thesis Department of General Practice, The University of Melbourne; 2007.
- 8  
9  
10 (11) Swinglehurst D, Roberts C, Greenhalgh T. Opening up the "black box" of the electronic patient record: A linguistic ethnographic study in general practice. *Communication and Medicine* 2011;8(1):3-15.
- 11  
12  
13 (12) Swinglehurst D, Greenhalgh T, Roberts C. Computer templates in chronic disease management: ethnographic case study in general practice. *BMJ Open* 2012;2:e001754.
- 14  
15  
16 (13) Greenhalgh T, Voisey C, Robb N. Interpreted consultations as 'business as usual'? An analysis of organisational routines in general practices. *Sociology of Health and Illness* 2007;29:931-54.
- 17  
18  
19 (14) Li S, Pearson D, Escott S. Language barriers within primary care consultations: an increasing challenge needing new solutions. *Education for Primary Care* 2010;21:385-91.
- 20  
21 (15) Hale SB. *Community Interpreting*. Basingstoke: Palgrave Macmillan; 2007.
- 22  
23 (16) Seale C, Rivas C, Kelly M. The challenge of communication in interpreted consultations in diabetes care: a mixed methods study. *Br J Gen Pract* 2013;DOI: 10.3399/bjgp13X663082.
- 24  
25 (17) Bischoff A, Loutan L. *Other Words, Other Meanings - a guide to health care interpreting in international settings*. Geneva: Serve de médecine internationale et humanitaire, HUG; 2008.
- 26  
27 (18) Guex P, Singy P. *Quand la médecine à besoin d'interprètes*. Genève: Éditions médecine et hygiène; 2003.
- 28  
29 (19) Roberts C, Moss B, Wass V, et al. Misunderstandings: a qualitative study of primary care consultations in multilingual settings, and educational implications. *Medical Education* 2005;39:465-75.
- 30  
31 (20) Lown B, Rodriguez D. Lost in Translation? How Electronic Health Records Structure Communication, Relationships, and Meaning. *Academic Medicine* 2012;87:392-4.
- 32  
33 (21) Kai J. *Valuing diversity: a resource for health professional training to respond to cultural diversity*. London: Royal College of General Practitioners; 2006.
- 34  
35 (22) Tebble H. *Medical Interpreting: Improving communication with your patients*. Geelong, Victoria: Deakin University; 1998.
- 36  
37 (23) Lie D, Berekenyei S, Braddock C, et al. Assessing Medical Students' Skills in Working with Interpreters During Patient Encounters: A Validation Study of the Interpreter Scale. *Academic Medicine* 2009;84:643-50.
- 38  
39 (24) Booth N, Kohannejad J, Robinson P. *Information in the consulting room - training package*. Sowerby Centre for Health Informatics at Newcastle; 2002 Jul.
- 40  
41  
42  
43  
44  
45  
46  
47  
48  
49  
50  
51  
52  
53  
54  
55  
56  
57  
58  
59  
60

- 1  
2  
3 (25) Mitchell J. Producing data: Case studies. In: Ellen R, editor. *Ethnographic Research: A Guide*  
4 *to General Conduct*. London: Academic Press; 1984. p. 237-41.  
5  
6 (26) Roberts C, Sarangi S. Theme-oriented discourse analysis of medical encounters. *Medical*  
7 *Education* 2005;39:632-40.  
8  
9 (27) Heritage J. Goffman, Garfinkel and Conversation Analysis. In: Wetherell M, Taylor S, Yates S,  
10 editors. *Discourse Theory and Practice*. London: Sage Publications; 2001. p. 47-56.  
11  
12 (28) Rampton B, Tusting K, Maybin J, Barwell R, Creese A, Lytra V. UK Linguistic Ethnography: A  
13 discussion paper. Downloadable from [http://www.ling-](http://www.ling-ethnog.org.uk/documents/papers/ramptonetal2004.pdf)  
14 [ethnog.org.uk/documents/papers/ramptonetal2004.pdf](http://www.ling-ethnog.org.uk/documents/papers/ramptonetal2004.pdf). 2004.  
15  
16 (29) Hammersley M. *What's Wrong with Ethnography?* London: Routledge; 1992.  
17  
18 (30) Byrne PS, Long BEL. *Doctors Talking to Patients. A Study of the Verbal Behaviour of General*  
19 *Practitioners Consulting in their Surgeries*. London: HMSO; 1976.  
20  
21 (31) Kurtz S, Silverman J. The Calgary-Cambridge referenced observation guides: an aid to  
22 defining the curriculum and organising the teaching in communication training programmes.  
23 *Medical Education* 1996;30:83-9.  
24  
25 (32) Edelsky C. Who's got the floor? *Language and Society* 1981;10(3):383-421.  
26  
27 (33) Davies P. The crowded consultation. *Br J Gen Pract* 2012;62:648-9.  
28  
29 (34) Heritage J, Maynard DW. *Communication in Medical Care*. Cambridge: Cambridge University  
30 Press; 2006.  
31  
32 (35) Schegloff EA. Notes on a conversational practice: formulating place. In: Sudnow D, editor.  
33 *Studies in Social Interaction*. New York: Free Press; 1972.  
34  
35 (36) Robinson JD. Getting Down to Business: Talk, Gaze and Body Orientation during Openings of  
36 Doctor-Patient Consultations. *Human Communication Research* 1998;25(1):97-123.  
37  
38 (37) Ruusuvuori J. Looking means listening: coordinating displays of engagement in doctor-  
39 patient interaction. *Social Science & Medicine* 2001;52(7):1093-108.  
40  
41 (38) Goffman E. *Involvement. Behavior in Public Places*. New York: The Free Press; 1966. p. 33-42.  
42  
43 (39) Atkinson P. Medical discourse, evidentiality and the construction of professional  
44 responsibility. In: Sarangi S, Roberts C, editors. *Talk, work and institutional order*. Berlin, New  
45 York: Mouton de Gruyter; 1999.  
46  
47 (40) Gwyn R, Elwyn G. When is a shared decision not (quite) a shared decision? Negotiating  
48 preferences in a general practice encounter. *Social Science & Medicine* 1999;49(4):437-47.  
49  
50 (41) Roberts C. Continuities and Discontinuities in Doctor-Patient consultations in a multilingual  
51 society. In: Gott M, Salager-Meyer F, editors. *Advances in Medical Discourse Analysis: Oral*  
52 *and Written Contexts*. Bern: Peter Lang; 2006. p. 177-96.  
53  
54 (42) Li S. Co-construction of interpreted conversation in medical consultations. *Applied*  
55 *Linguistics Review* 2013;4:127-49.  
56  
57  
58  
59  
60

1  
2  
3  
4  
5  
6  
7  
8  
9  
10  
11  
12  
13  
14  
15  
16  
17  
18  
19  
20  
21  
22  
23  
24  
25  
26  
27  
28  
29  
30  
31  
32  
33  
34  
35  
36  
37  
38  
39  
40  
41  
42  
43  
44  
45  
46  
47  
48  
49  
50  
51  
52  
53  
54  
55  
56  
57  
58  
59  
60

(43) Bolden GB. Toward understanding practices of medical interpreting: interpreters' involvement in history taking. *Discourse Studies* 2000;2:387-419.

(44) Stake RE. Qualitative Case Studies. In: Denzin NK, Lincoln YS, editors. *The Sage Handbook of Qualitative Research*. 3rd ed. Sage Publications, Inc; 2005. p. 443-66.

For peer review only

1  
2  
3  
4  
5  
6  
7 **Beyond the 'dyad': A qualitative re-evaluation of the**  
8 **changing clinical consultation.**  
9

10  
11 **Deborah Swinglehurst\***; **Celia Roberts**; **Shuangyu Li**; **Orest Weber**; **Pascal**  
12 **Singy**  
13

14 Deborah Swinglehurst is Senior Clinical Lecturer at the Centre for Primary Care and  
15 Public Health, Barts and The London School of Medicine and Dentistry, Queen Mary,  
16 University of London, UK.

17 Celia Roberts is Professor of Applied Linguistics in the Department of Education and  
18 Professional Studies, King's College London, UK.

19 Shuangyu Li is Lecturer in Clinical Communication at the Division of Medical  
20 Education, School of Medicine, King's College London, UK.

21 Orest Weber is Researcher at the Psychiatric Liaison Service, Lausanne University  
22 Hospital, Lausanne, Switzerland.

23 Pascal Singy is Associate Professor of Sociolinguistics and Director of Research at  
24 the Psychiatric Liaison Service, Lausanne University Hospital, Lausanne,  
25 Switzerland.

26 **\*Corresponding author at:** Centre for Primary Care and Public Health, Barts and  
27 The London School of Medicine and Dentistry, Queen Mary, University of London,  
28 58 Turner Street, London E1 2AB, UK. Email: [d.swinglehurst@qmul.ac.uk](mailto:d.swinglehurst@qmul.ac.uk).  
29 Telephone +44 20 7882 7204 Fax +44 20 7882 2552  
30  
31  
32  
33

34 **Keywords:** globalisation; multilingualism; electronic patient record; clinical  
35 communication; technology  
36  
37  
38

39 **Word count:** **41994323**  
40  
41  
42  
43  
44  
45  
46  
47  
48  
49  
50  
51  
52  
53  
54  
55  
56  
57  
58  
59  
60

## ABSTRACT

### Objective

To identify characteristics of ~~clinical~~ consultations which do not conform to the traditionally understood communication 'dyad', in order to highlight implications for medical education and develop a reflective 'toolkit' for use by medical practitioners and educators in the analysis of consultations.

### Design

A series of interdisciplinary research workshops spanning 12 months explored the social impact of globalisation and computerisation on the clinical consultation, focusing specifically on contemporary challenges to the clinician-patient dyad. Researchers presented detailed case studies of consultations, taken from their recent research projects. Drawing on concepts from applied sociolinguistics, further analysis of selected case studies prompted the identification of key emergent themes.

### Setting

University departments in the UK and Switzerland.

### Participants

Six researchers with backgrounds in medicine, applied linguistics, sociolinguistics and medical education. One workshop was also attended by PhD students conducting research on healthcare interactions.

### Results

1  
2  
3  
4  
5  
6  
7 The contemporary consultation is characterised by a multiplicity of voices. ~~The~~  
8 ~~incorporation~~ of additional voices in the consultation creates new forms of order  
9 (and *dis*-order) in the interaction. The roles 'clinician' and 'patient' are blurred as they  
10 become increasingly distributed between different participants ~~in the consultation~~.  
11  
12 These new consultation arrangements make new demands on clinicians which lie  
13 beyond the scope of most educational programmes for clinical communication.  
14  
15  
16  
17

## 18 Conclusion

19  
20  
21 ~~The consultation is changing.~~ Traditional consultation models which assume a  
22 'dyadic' consultation do not adequately incorporate the realities of many  
23 contemporary consultations. A paradox emerges between the need to manage  
24 consultations in a 'super-diverse' multilingual society, whilst also attending to  
25 increasing requirements for standardised protocol-driven approaches to care ~~and~~  
26 ~~data gathering~~ prompted by computer use ~~in the consultation~~.  
27  
28 ~~The consultation is changing.~~ ~~The tension between standardisation and flexibility~~  
29 ~~requires addressing in educational contexts.~~ Drawing on concepts from applied  
30 sociolinguistics and the findings of these research observations, the authors offer a  
31 reflective 'toolkit' of questions to ask of the consultation in the context of enquiry  
32 based learning.  
33  
34  
35  
36  
37  
38  
39  
40  
41  
42

43  
44 (300 words)

## 45 46 47 48 ARTICLE SUMMARY

### 49 50 51 Strengths and limitations of this study

- Brings insights from applied sociolinguistics to the analysis of consultations, [including detailed interactional transcription and analytic concepts. These may be unfamiliar to some readers and we recognise it is not easy to make them accessible](#)
- Addresses the mismatch between consultations as conceptualised in communication models and the reality of many contemporary consultations
- Offers a research-informed output, a 'reflective toolkit', for use in practice by clinicians and educators
- Focuses on issues relevant to a globalised, technology-driven world, but does not address all types of consultation which breach the communication dyad (e.g. clinician - patient - carer)

**KEYWORDS:** globalisation; multilingualism; electronic patient record; communication skills; technology

## INTRODUCTION

Two of the most significant changes affecting communication in the consultation are the increasing use of computers (the 'technologisation' of care)(1) and globalisation. The use of electronic patient records (EPRs) is gathering pace throughout Europe with the UK, the Netherlands and Scandinavia leading the way. (2-4) Globalisation (the movement of people, their languages, cultural practices, artefacts and 'norms' between countries) is creating 'super-diverse' multilingual populations.(5) According to the 2011 census in England and Wales, 29% of the population were born abroad or have a parent or grandparent born abroad. In Switzerland, 35.1% of over-15s are first- or second-generation migrants.(6) These social changes have significant impacts on the consultation.

Researchers of electronic patient records have coined the term 'triadic' consultation to highlight the computer as an influential third party in the consultation.(7-10) Swinglehurst et al. go further, conceptualising the EPR as bringing a wide range of competing voices to the consultation and shaping its dynamics.(11;12) Likewise, the dynamics of multilingual consultations are changed by the inclusion of professional and *ad hoc* interpreters (untrained family members, staff or volunteers). The resulting configuration has been referred to as a 'trialogue'.(13-18) An increasing number of consultations involve patients (and doctors) communicating in a language other than their first language, or in a variety of the majority language (e.g. English) influenced by their first language. In these consultations the communication barrier may lead to a 'loss' of patient voice (examples 2 and 3 in this paper) or to unresolved misunderstandings arising from subtle differences in speech delivery, word stress and styles of self-presentation. (19)



1  
2  
3  
4  
5  
6  
7 Consultations which incorporate socio-technical or sociolinguistic challenges (or  
8 both) are increasingly the norm in large urban areas. Although medical educators  
9 recognise that consultations are growing in complexity,(20) educational resources  
10 addressing these complexities remain limited. Current consultation models assume a  
11 communication 'dyad' in which two voices (patient and clinician) engage in focussed  
12 interaction using broadly shared ways of communicating. Communication tends to be  
13 envisaged as a series of learned prototypical 'skills' or procedures for accomplishing  
14 clinical tasks rather than as a dynamic interaction which emerges moment-by-  
15 moment, shaped by every interactional nuance along the way. Assumptions about  
16 the nature of communication are reflected in strategies currently advocated for  
17 interpreted consultations such as: advising the interpreter what is expected up front;  
18 explaining the interpreter's role to the patient; allowing ample time; asking one  
19 question at a time; clarifying confusing responses; seeking 'cultural information' from  
20 the interpreter afterwards.(17;21-23) Likewise, in computer mediated consultations  
21 doctors are advised to avoid trying to attend to patient and computer at the same  
22 time (e.g. by 'signposting' computer use), to use mobile monitors and to 'look at the  
23 patient'.(8;24) Although these suggestions are useful, they overlook the fact that the  
24 interaction is itself fundamentally and profoundly changed by these new  
25 arrangements.

26  
27  
28  
29  
30  
31  
32  
33  
34  
35  
36  
37  
38  
39  
40  
41  
42  
43  
44 This paper explores the characteristics of these contemporary consultations through  
45 presentation of case studies selected as 'telling cases' (25) highlighting the  
46 challenges arising in consultations which involve a meeting of more than two voices.  
47 Analytic observations are developed into a reflective 'toolkit' for use in the  
48 educational context while analysing learners' video-recorded consultations. [For](#)  
49  
50  
51  
52  
53  
54  
55  
56  
57  
58  
59  
60

1  
2  
3  
4  
5  
6  
7 [readers who may be unfamiliar with sociolinguistic concepts presented in this paper](#)  
8 [we include a list of definitions in Box 1.](#)  
9  
10

## 11 12 13 **METHODS**

14  
15  
16 A series of interdisciplinary workshops was held over a 12- month period bringing  
17 together academics specialising in healthcare communication. Their disciplinary  
18 backgrounds spanned medicine, applied linguistics, sociolinguistics and medical  
19 education. Case study presentations were followed by discussion, leading to further  
20 analysis of primary interactional data. The case studies were selected from four  
21 ethnographic/sociolinguistic research projects drawing on theme-orientated  
22 discourse analysis (26), conversation analysis (27) and linguistic ethnography (28).  
23  
24 The research projects had received ethical approval (Thames Valley multi-centre  
25 REC 06/MRE12/81; NHS Bradford REC 09/H1302/106; REC of Vaud, Switzerland  
26 271/07; St. Thomas' Hospital local REC).  
27  
28  
29

30  
31 The selection of case studies was informed by case study methodology and based  
32 on a key ethnographic principle, that of 'developing theory through the study of  
33 critical cases' (page 20) (29). The workshops drew on Mitchell's concept of a 'telling'  
34 case study 'in which the particular circumstances surrounding a case serve to make  
35 previously obscure theoretical relationships apparent' (page 239) (25).  
36  
37

38  
39 So, telling cases from the four research projects were selected as examples of  
40 consultations which breach the clinician-patient 'dyad', incorporating additional  
41 'voices'. The authors worked together to identify synergies across them, teasing out  
42 themes and valid connections between events and phenomena relevant to medical  
43  
44  
45  
46  
47  
48  
49  
50  
51  
52  
53  
54

1  
2  
3  
4  
5  
6  
7 education. Case studies explored the following: the interactional structure of general  
8 practitioners' (GP) consultations involving interpreters; the shaping influence of the  
9 EPR in primary care consultations; consultations involving patients communicating in  
10 a language other than their first language. The nature of the additional 'voices' in the  
11 latter example may not be immediately apparent, but relates to socio-cultural scripts  
12 originating *beyond* the consultation and informing notions of how to present oneself,  
13 ideas about the self (and the clinician), one's relationship to authority, expectations  
14 of the healthcare system, for example. Although there is an extensive literature on  
15 cultural health beliefs, precisely how patients present themselves, how they voice  
16 their concerns and the impact of differences in linguistic background on the  
17 orderliness and distribution of knowledge and expertise have been much less  
18 studied.  
19

## 20 21 22 23 24 25 26 27 28 29 30 **RESULTS**

31  
32 We identified two key interrelated themes which are the main focus of this article:  
33 *orderliness* and *distribution*. We will begin by introducing these themes and will then  
34 present some short extracts of data analysis illustrating how these themes play out in  
35 the contemporary consultation and how they disrupt the dyadic nature of the  
36 consultation.  
37  
38  
39  
40  
41  
42

### 43 **'Orderliness' in the contemporary consultation**

44  
45 The 'orderliness' of the consultation has been the subject of much previous research.  
46 Medical educators will be familiar with the stages of the consultation described by  
47 Byrne and Long in 1976,(30) and with more detailed models (e.g. Calgary-  
48 Cambridge) which are currently favoured within educational curricula.(31) These  
49 models describe the consultation in more-or-less discrete phases such as 'gathering  
50  
51  
52  
53  
54  
55

1  
2  
3  
4  
5  
6  
7 information' and 'explanation and planning'. Each stage is associated with a set of  
8  
9 skills which underpin formative and summative assessments of medical students and  
10  
11 some professional licensing examinations (e.g. the UK Clinical Skills Assessment  
12  
13 forms part of the licensing examination for general practitioners).

14  
15 Apart from the assumption that the consultation, with its various 'phases', is an  
16  
17 orderly affair, these models tend to assume a structuralist orientation to language.  
18 that is, the talk shared between clinician and patient is assumed to represent  
19  
20 particular meanings – talk is simply *representative* of reality. For example, when a  
21  
22 clinician 'summarises' the consultation, this summary is assumed to reflect a concise  
23  
24 version of the patient's story, which is in turn assumed to represent the patient's  
25  
26 experience. An alternative *social constructionist* perspective would also consider the  
27  
28 additional work being *accomplished* by summarising – for example: the clinician's  
29  
30 opportunity to take back the 'speaking floor';(32) the organisation of the story; the  
31  
32 emphasis afforded to those aspects perceived to be most salient to diagnostic  
33  
34 reasoning or clinical management; the clinician's construction of their professional  
35  
36 identity. From this perspective the encounter is relatively unstable, and the  
37  
38 orderliness of the consultation, or its identified 'phases' are not so much inevitable  
39  
40 *attributes* of the consultation, but are 'brought about' or 'worked up' through  
41  
42 interaction. This 'bringing about' is informed by previous cumulative experience of  
43  
44 what usually happens in the kind of interaction we recognize as a 'medical  
45  
46 consultation', but involves a certain amount of improvisation along the way.

#### 47 48 **'Distribution' in the contemporary consultation**

49  
50 In consultations that lie beyond the 'dyad' by inclusion of additional people (e.g.  
51  
52 interpreters) or technologies (e.g. electronic patient records) or patients whose first  
53  
54

1  
2  
3  
4  
5  
6  
7 language is not English, we face new configurations in terms of the distribution of  
8 knowledge, power, authority and social identities. In what has been called the  
9 “crowded” consultation(33) where many voices meet, new questions become salient  
10 and contested. For example: *Who is doing the talking? Whose voice is heard? How*  
11 *is knowledge distributed? What is important medical knowledge? Whose interests*  
12 *are being served? Who is the patient? Who is the clinician?*  
13  
14  
15  
16  
17  
18

### 19 **Analysis of ‘orderliness’ and ‘distribution’ of roles in the contemporary** 20 **consultation** 21

22  
23 In this section we will illustrate how ‘orderliness’ and ‘distribution’ play out in  
24 consultations which breach the communication dyad, using selected data extracts.  
25 These examples combine the micro-analytic methods used in conversation analysis  
26 (CA) with ethnographic observation of the relevant institutional contexts, mindful that  
27 this broader context shapes interaction in important ways. CA considers the detailed  
28 systematic patterns and regularities that arise as each speaker takes up, interprets  
29 and responds to the other’s turn.(34;35) Our case studies show how the well-  
30 described orderliness of the consultation becomes disturbed when additional voices  
31 are introduced, as new forms of order and dis-order emerge and care becomes  
32 increasingly distributed. We have retained the transcribing conventions used in each  
33 original study (see Appendix). The text is interspersed with suggestions of reflective  
34 questions which emerge from our data analysis. [We anticipate that these questions](#)  
35 [will encourage tutors and learners to discover the importance of considering the](#)  
36 [consultation as an emergent co-constructed phenomenon, requiring a degree of](#)  
37 [improvisation. They are ~~designed-intended~~ for use by tutors in undergraduate and](#)  
38 [postgraduate contexts \(e.g. general practice \(GP\)GP training\) when ~~designing and~~](#)  
39 [teaching clinical communication and also by](#) learners as they play back [and reflect](#)  
40  
41  
42  
43  
44  
45  
46  
47  
48  
49  
50  
51  
52  
53  
54  
55  
56  
57  
58  
59  
60

1  
2  
3  
4  
5  
6  
7 on their own video-recorded consultations, sensitising them to ~~the~~ particular  
8 challenges posed in these types of complex consultations and extending the range  
9 of available tools for critical analysis. Their value may be enhanced by educational  
10 support from an ~~applied~~ sociolinguist or a more collaborative interdisciplinary  
11 pedagogy which brings together clinicians and linguists. We also hope that the  
12 questions will encourage learners to discover the importance of considering the  
13 consultation as an emergent co-constructed phenomenon, requiring improvisation.  
14  
15  
16  
17  
18  
19

20  
21 First, we look at the opening of a consultation between a nurse (N) and patient (P),  
22 English speakers who haven't met before (**Figure 1**). The institutional context is an  
23 annual asthma check, a requirement of the UK Quality and Outcomes Framework  
24 (QOF) for which incentive payments are made. The nurse is completing a computer  
25 template (form) during the consultation. The transcript includes notes on bodily  
26 conduct and the computer screen display.  
27  
28  
29  
30  
31

32  
33 <<INSERT FIGURE 1 ABOUT HERE>>  
34

35  
36 She frames the consultation as an 'assessment' emphasising it is really (01:08) or  
37 very (01:19) straightforward. The linearity of the upcoming consultation is alluded to  
38 as she counts a 3-part list with her fingers. She demarcates the purpose of the clinic,  
39 laying it out as an orderly affair and (implicitly) setting limits on what can happen.  
40  
41 She adds to this later (at 2:09, transcript not shown), while gesturing towards the  
42 EPR: *"What I've got here is some questions that I – I need to ask you. They're fairly*  
43 *straightforward ones but what they tend to do with is that they will flag up whether*  
44 *there >actually< we have got what w- what I would call breakthrough symptoms."*  
45  
46 Reiterating that it is 'straightforward', the phrase *"I need to ask you"* points to an  
47 underlying institutional requirement. Reassurance focuses on an anticipated  
48  
49  
50  
51  
52  
53  
54  
55

1  
2  
3  
4  
5  
6  
7 orderliness of the clinic, dealing up front with any misalignment between what the  
8 patient may expect and what the nurse is required to do. But this is a different kind of  
9 order to that which we might expect. This is an orderliness in which the electronic  
10 template is instrumental, rather than one which emerges through dialogue between  
11 clinician and patient.(12)  
12  
13  
14  
15

16  
17 The nurse then goes on to speak *not* of symptoms, but of inhalers (transcript  
18 omitted) and then smoking. Here the template introduces a topic (smoking) which  
19 seems tangential to this patient's particular circumstances, although it is important to  
20 asthma care in general terms, and has institutional significance, being a QOF  
21 indicator. The EPR thus brings an institutional voice into the encounter, making  
22 relevant the patient's identity as a lifelong non-smoker in this context. It contributes  
23 to defining what is important medical knowledge, reproducing particular definitions of  
24 'quality' in practice - gathering data about (non-)smoking for QOF being an example.  
25  
26 The patient becomes an epidemiological informant and 'quality' is transformed into  
27 meeting an institutional requirement rather than focussing on the specific quality of  
28 care of the individual. At 2.50 - 2.52 the nurse's emphatic evaluations "*excellent,*  
29 *that's great*" are spoken towards the EPR as she types, apparently referring to her  
30 satisfaction at meeting its demands, the patient watching from the sidelines. At the  
31 very least it is ambiguous to whom (or what) these superlatives relate.  
32  
33  
34  
35  
36  
37  
38  
39  
40  
41  
42  
43  
44

45 The analytic question of "*Who is doing the talking?*" is at issue here. For example,  
46 the authorship of the words at 2:47 is apparently distributed between the nurse and  
47 the EPR. We see a disruption of the usual conventions of conversation, with this  
48 comment spoken by the nurse as she looks at the computer screen rather than at  
49 the patient to whom she expects to hand over the speaking 'turn'. The nurse's  
50 attention is divided between what has been called the patient *embodied* and the  
51  
52  
53  
54  
55

1  
2  
3  
4  
5  
6  
7 patient *inscribed* (36;37) as the patient becomes (metaphorically) distributed  
8  
9 between person and record.(36) The nurse is *cognitively* oriented to the patient as  
10  
11 she establishes his smoking status by looking at the EPR, but the *affective* aspect of  
12  
13 her involvement - which Goffman has highlighted as crucial in a social interaction -  
14  
15 is compromised.(38) This “template talk” is met by a 0.4 second pause. The nurse  
16  
17 then turns to face the patient, adding “*that’s what I’ve got here*” - this time evoking a  
18  
19 response, as they jointly repeat “*never smoked*”, words which were initially displayed  
20  
21 on the EPR screen (visible only to the nurse).

22  
23 Box 4-2 suggests some reflective questions to ask of consultations involving the  
24  
25 EPR. Students may find it helpful to use the transcript in Figure 1 to gain familiarity  
26  
27 with these questions before asking the same questions of their own video-recorded  
28  
29 consultations. In the following sections, we incorporate reflective questions arising  
30  
31 from our data analysis as applicable to different kinds of complex consultations.

32  
33 <<INSERT BOX 24 ABOUT HERE>>

34  
35  
36 Our next example (Figure 2) is from a GP consultation with a patient from Nigeria  
37  
38 who speaks a variety of English that differs from local English. Whilst on holiday in  
39  
40 Nigeria he was bitten by a dog, raising the question of whether he might have been  
41  
42 exposed to rabies (lines 1-4) and considered for vaccination.

43  
44 <<INSERT FIGURE 2 ABOUT HERE>>

45  
46  
47 This example illustrates an unresolved ambiguity which arises from different  
48  
49 conventions in standard English and Nigerian English over the use of contrastive  
50  
51 stress (indicated by \* in data). Disorder, misunderstanding, and an incorrect  
52  
53 assessment ensue. In lines 4-7 the patient tells the GP he knows the dog’s owner  
54  
55



1  
2  
3  
4  
5  
6  
7 and that the dog visits the vet regularly. This reassures the GP that the patient is at  
8 low risk (line 12: "*oh fair enough*") and he in turn later reassures the patient that no  
9 vaccination is needed. In fact the patient was conveying his concern that the dog  
10 may **not** be free of rabies, and that the owner could not be trusted. When the patient  
11 says "*they told me the dog go to the vet regular but that's what they said*" (lines  
12 6,7,9, highlighted in bold in transcript) he emphasizes the agent (*they*) and the  
13 content of the agent's talk (*what*). The equivalent sentiment in standard English  
14 would be "*they told me the dog goes to the vet regular, but that's what they said*" with  
15 the emphasis on the verbs ("told", "said"). Although the patient offers further hints of  
16 his scepticism in line 13 - a hesitation, laughter and the word "but" - the underlying  
17 ambiguity is passed over, and absent from the institutional record made by the  
18 doctor. Misunderstandings, or the illusion of understanding, which result from small  
19 and subliminally processed differences in talk, are more frequent in a multi-lingual  
20 patient population(19) and challenge conventional orderliness. But no simple  
21 behaviours can be taught in situations of super-diversity as our next two examples  
22 also show.  
23  
24  
25  
26  
27  
28  
29  
30  
31  
32  
33  
34  
35  
36

37  
38 **Figure 3** shows an extract of a video-recorded consultation in a Swiss pain clinic  
39 (translated from French) in which consent is sought for a spinal injection. The patient  
40 left his home country 10 years earlier after a war, and has very limited command of  
41 French. He has chronic low back pain for which he has received spinal injections. He  
42 is worried about the risks involved, because a previous consent form (translated by  
43 his daughter) referred to a risk of paralysis.  
44  
45  
46  
47  
48  
49

50 <<INSERT FIGURE 3 ABOUT HERE>>  
51  
52  
53  
54  
55

1  
2  
3  
4  
5  
6  
7 As in the previous example, there is obvious asymmetry of the linguistic resources  
8 available. Indeed the entire extract might be regarded as a continuous, extended and  
9 only partly repaired misunderstanding. Both parties struggle to grasp at least some  
10 meaning in the words of the other. An interview with both interactants afterwards  
11 (data not shown) suggested that some areas of shared understanding were reached:  
12 the patient's fear of the injection, the positive impact of a previous injection and  
13 agreement to proceed today. But other communicative efforts failed, including the  
14 doctor's attempt to reassure the patient that paralysis does not happen often.  
15 Indeed, the patient reported that the doctor had particularly reminded him of the risks  
16 of paralysis adding that he, the patient, had to take responsibility for this risk. The  
17 patient's fear (linked it appears to some past experience in the war) is not explored.  
18 Arguably under conditions of such scarce common linguistic means this topic may be  
19 deemed too complex to tackle; the patient's voice from the past is lost.

20  
21  
22 ~~Phenomena of discursive dispersion and fragmentation of~~Difficulties arising in the  
23 clinical decision-making process have previously been described in monolingual  
24 contexts,(39;40) but they become magnified when patients have limited proficiency  
25 in the language of consultation. In this multilingual context the ideals of shared  
26 decision-making within an ordered consultation are eroded. In this example, the  
27 doctor first presents his idea, tries to convince the patient of the benefits of another  
28 injection and goes on to investigate the patient's worries and possible reasons for  
29 disagreement. But the participants fail to connect the discursive threads of this  
30 discussion to the final decision. Patient consent follows immediately after major  
31 interactional troubles, culminating in a self-critical meta-communicative account by  
32 the patient ("*I don't know how to explain well*") and an abrupt topic shift by the doctor.

1  
2  
3  
4  
5  
6  
7 The doctor appears to cut to the decision making when he gives up on achieving  
8 further clarity about the patient's stance.  
9

10  
11 << INSERT BOX 32 >>  
12

13  
14 Consultations like those in **Figures 2 and 3** in which the clinician and patient are not  
15 'in tune' with each other require considerable and not always successful  
16 collaborative work by both parties to prevent, recognise and repair  
17 misunderstandings.(41) The use of interpreters may address these issues to some  
18 extent, but not without introducing different challenges. The work of consulting  
19 becomes distributed between at least three participants, changing the relationship of  
20 the speakers to their own words and so disturbing roles and identities. The  
21 orderliness in interpreted consultations is changed, both in terms of overall structure  
22 and in micro-interactional patterns. Clinicians have to do more than simply establish  
23 consensus on the mode of communication and the role of the interpreter as  
24 suggested by recent guidelines.(16;17) At the micro-level, extra verbal exchanges  
25 are required to clarify misunderstandings (as we saw in Figures 2 & 3). The  
26 traditional doctor↔patient (dyadic) interactional sequence becomes a more  
27 complicated 'triadic' pattern. Close inspection of interpreted consultations shows that  
28 this assumed prototypical triadic sequence (doctor→interpreter→patient or  
29 patient→interpreter→doctor) is not always observed by participants, so that one or  
30 more participants' voices are 'lost'.(16;42) The power to decide who talks next is  
31 *unequally* distributed among the three participants – with patients at the bottom of  
32 the hierarchy. Even when the prototypical doctor-interpreter-patient sequence *is*  
33 followed, there remains considerable scope for misunderstanding, due to ambiguity  
34 over interpreter's role and how the interpreting task is actually done in practice. The  
35 interpreter delivers a 'hybrid' voice which incorporates the voices of all three  
36  
37  
38  
39  
40  
41  
42  
43  
44  
45  
46  
47  
48  
49  
50  
51  
52  
53  
54  
55

1  
2  
3  
4  
5  
6  
7 participants in the interaction. **Figure 4** shows an extract from an interpreted  
8 consultation in England with a Czech-speaking patient who has complained of  
9 headaches. It gives some insight into how the themes of orderliness and distribution  
10 play out in an interpreted consultation.  
11  
12  
13

14  
15 <<INSERT FIGURE 4 ABOUT HERE>>  
16

17 From lines 1 to 10, the participants follow the triadic sequence in their turn-taking.  
18 However, what the doctor and patient hear is ~~pre-processed~~ (re-  
19 contextualised) reformulated by the interpreter. In Line 1, the doctor asks a question.  
20 Prior to the question he refers to an earlier discussion about the patient's pain,  
21 signposting a change of topic. However, this signposting is omitted by the interpreter  
22 in Lines 3-4. Similarly, in Lines 5-7 the interpreter adds 'that start afternoon' into her  
23 translation although the patient did not say these words here. As Bolden points out,  
24 an interpreter is constantly choosing the quantity and quality of information that is  
25 translated, thus creating a hybrid voice and assigning themselves an extra role as  
26 either 'doctor' or 'patient' with blurring of the usual boundaries between the two.(43)  
27 The potential for voices to become 'lost' in this process is greatest when the  
28 prototypical triadic sequence is not followed.  
29  
30  
31  
32  
33  
34  
35  
36  
37  
38  
39  
40

41 At line 10, the doctor comments on the interpreter's response ("Interesting. That's  
42 good"). If the (assumed) triadic sequence was followed, one would expect either that  
43 the doctor would continue talking at this point, or that he would pass the speaking  
44 turn to the interpreter to translate his words. Either way, we would not expect the  
45 patient to have a turn here. However, the patient (line 11) brings in a new topic,  
46 ostensibly in an 'inappropriate' place. Her utterance is not translated and goes  
47 unheard as the doctor interrupts the patient (line 13) before she can finish her talk;  
48  
49  
50  
51  
52  
53  
54

1  
2  
3  
4  
5  
6  
7 this marks the patient's entry as 'not legitimate'. The doctor and the interpreter then  
8 continue the conversation following the triadic sequence. In the wider dataset from  
9 which this extract is taken, we found that doctors also speak at such 'inappropriate  
10 places'. However there is a difference. In most cases, the words of the doctor *are*  
11 translated, and the patient is put 'on hold' while this is done. In other words, when  
12 the prototypical doctor-interpreter-patient sequence breaks down it is the *interpreter*  
13 who takes on the role of 'distributor' of speaking turns and decides whose voice will  
14 be preferentially heard. In our dataset, interpreters tended to prioritise the doctor's  
15 right to speak, as illustrated in **Figure 4**.  
16  
17  
18  
19  
20  
21  
22  
23

24 << INSERT BOX [43](#) ABOUT HERE >>  
25  
26  
27  
28  
29

## 30 DISCUSSION

31  
32 Rapid technological and demographic change has brought challenges to the  
33 consultation which were not anticipated when the consultation models currently  
34 taught to students were developed. Using a selection of 'telling' cases as a basis for  
35 analysis we have been able to develop novel conceptual ideas about the  
36 contemporary consultation which challenge normative assumptions, showing that the  
37 notion of the consultation as a dyadic meeting of two speakers who share  
38 communicative resources is frequently challenged. Our priority has been on depth of  
39 analysis rather than breadth, with our selection of case studies informed by the  
40 'opportunity to learn' rather than by concerns around 'typicality'.(44) Based on a  
41 detailed study of four contrasting cases we suggest there are complex new  
42 configurations of voices in the consultation, and - as a consequence of this - the  
43 potential for 'losing' the patient voice. These challenges to the 'dyadic' consultation  
44  
45  
46  
47  
48  
49  
50  
51  
52  
53  
54

1  
2  
3  
4  
5  
6  
7 rarely receive explicit attention in the educational curriculum. One striking  
8 observation which emerges from our data is that the twin social pressures of  
9 globalisation and technologisation appear to place paradoxically opposing demands  
10 on the consultation. On the one hand, clinicians are challenged with increasingly  
11 diverse, unpredictable consultations from a sociolinguistic perspective, requiring  
12 flexibility and a tolerance of ambiguity. On the other, there is increasing pressure to  
13 'standardise' practices, for example through greater use of EPR templates.  
14  
15  
16  
17  
18  
19

20  
21 Building on our analysis of these case studies we have offered a series of reflective  
22 questions which may be relevant to ask of complex consultations which take on  
23 these new kinds of orderliness and in which conventional understandings of the roles  
24 of clinician and patient become blurred. These questions have not yet been tested  
25 empirically in an educational setting and do not constitute a definitive checklist. They  
26 may neither be relevant to all consultations nor necessarily comprehensive, but we  
27 hope that they are a starting point to promote observation and discussion about the  
28 consultation from an orientation which embraces its new complexities. Further  
29 empirical research is required to test the value of this toolkit as an educational  
30 intervention in practice and to refine it in the context of further educational research.  
31  
32  
33  
34  
35  
36  
37  
38  
39

40 We would like to invite debate amongst medical educators about how to adapt,  
41 extend or revise consultation models to ensure that these important aspects of the  
42 contemporary consultation do not remain overlooked. We suggest that an orientation  
43 to the consultation as a dynamic process which is co-constructed between clinician  
44 and patient is helpful, one in which the structure (we prefer 'orderliness') emerges  
45 out of the collaborative work of clinician and patient (and others) and which depends  
46 on how the 'work' of consulting is distributed between participants. Regarding the  
47 consultation as a co-construction demands more than a range of 'add-on' prompts  
48  
49  
50  
51  
52  
53  
54  
55

1  
2  
3  
4  
5  
6  
7 describing specific clinician behaviours. It encompasses a shift away from the idea  
8 that consulting is a set of competences to be mastered, towards a more analytical  
9 orientation. The most important overarching question to ask of the consultation shifts  
10 from “*Did I do that well?*” towards “*What did we accomplish there?*” This brings the  
11 contribution of the patient, and all relevant parties (or ‘voices’) into clearer view. The  
12 questions we offer to learners within our reflective ‘toolkit’ in this paper fall broadly  
13 within this overarching question.  
14  
15  
16  
17  
18  
19

20  
21 We urge educators to consider critically how their approach to teaching clinical  
22 communication might change if instead of assuming that the talk *represents* some  
23 kind of existing reality they also encourage students to consider conceptualising talk  
24 as *constructing* reality, an assumption which underpins this paper. We suggest that  
25 greater use of the detailed analysis of video-recordings of real (as opposed to  
26 simulated) consultations may be helpful, exposing learners - as consulters and  
27 critical observers - to the kinds of complexities that our research highlights. For  
28 example, a DVD by Roberts et al. entitled “*Doing the Lambeth Talk*” shows how  
29 misunderstandings in the multilingual consultation can be avoided and repaired.  
30  
31  
32  
33  
34  
35  
36  
37  
38  
39  
40  
41  
42  
43  
44  
45  
46  
47  
48  
49  
50  
51  
52  
53  
54  
55  
56  
57  
58  
59  
60

**Box 1. Definitions****Voice**

Drawing on social theory 'voice' has both literal and metaphorical meanings. It is used literally as the human voice i.e. the sound of the voice and the manner in which someone speaks. 'Voice' is used metaphorically a) in writing, to identify the distinctive style and authority that a text has e.g. the EPR b) in speech and writing, as multiple or hybrid voices, when different styles are conflated together or a dominant style is infused with a less noticed one.

**Dyad and Triad**

'Dyad' is the traditional one-to-one communication between two people (here the clinician and patient) which is seen as the norm. A 'triad' is an interaction of three people or voices. Here the conventional two person communication is disturbed and its norms are challenged.

**Misalignment**

'Misalignments' are uncomfortable or inappropriate moments or instances where one side has difficulty interpreting the assumptions of the other. They are also moments when the speakers appear to be on parallel tracks, not responding fully to the other.

**Agent**

'Agent' is a term used in grammar analysis to describe the person or thing in the sentence that is the main subject doing the action

**Repair**

'Repair' is used metaphorically to describe how misunderstandings and misalignments in interaction are dealt with. It often involves talking *about* talk, to sort the interactional problem out.

**Social constructionism**

An approach that assumes that reality is the result of historical, social and political processes, in which the interest of the researcher is in how phenomena come into being, the processes by which they come to be 'constructed' as they are.

**Box 2. Reflective questions based on Case 1 which might inform analysis of a student's own video-recorded consultations**

Which 'voices' can I identify as being present in this consultation?

Which voices are being privileged at different times in the consultation and why?

What is the consequence of this?

How do I ensure that the patient's voice is not lost?

How and to what extent do I need to re-shape my own communication norms / style to accommodate the specific arrangement of people and computer in this consultation?

How, and to what extent am I fully 'involved' in this consultation?

What does this mean to me and what challenge is this particular consultation presenting?

To whom and what am I attending, and with what purpose?

How am I incorporating computer templates and prompts?

What is the consequence for my communication with the patient?

To what extent is the sequencing and ordering of our talk being influenced, if at all, by the demands of the EPR?

Do I need to consider possible alternative ways of managing this situation?

How does interacting with the computer affect the standard models of good communication in the textbooks?



**Box 3. Reflective questions based on Cases 2 and 3 which might inform analysis of a student's own video-recorded consultations**

Which 'voices' can I identify as being present in this consultation?

How do I need to adjust my approach to the consultation when the talk *itself* seems to be the problem?

Am I confident that I correctly understood the patient's problem, in the knowledge that subtle features such as word stress and styles of self-presentation might differ in speakers whose variety of English is influenced by a language other than my own? If not, what were the other possible meanings of this section of talk?

How can I ensure that I clarify the patient's intended meanings?

Did the strategies that I used to do relational work in the consultation have the desired effect in this multilingual consultation? (Examples might include the use of humour, metaphor, or attempts at 'informal' conversational styles) Did I correctly identify the patient's attempts at relational work?

This consultation felt muddled and chaotic and did not evolve as I was expecting. Why might this be? Does my explanation reveal any underlying assumptions about how I understand the act of consulting, my expectations for the consultation, and my role as the clinician?

At what point do I decide I cannot consult effectively without an interpreter either because it is not clear whether the patient and I have understood each other or because I am concerned that the patient's voice is being lost?

Do the models of patient-centeredness and shared decision-making work when talk itself seems to be the problem?

**Box 4. Reflective questions based on Case 4 which might inform analysis of a student's own video-recorded consultations**

Which 'voices' can I identify as being present in this consultation?

How and to what extent do I need to re-shape my own communication norms / style to accommodate the specific arrangements of people in this consultation? Do the models of communication in the textbooks need to be adapted in this situation?

How confident am I that this interpreter is doing what they are supposed to do?

When do I notice that the sequence of speakers (doctor, interpreter, patient) is different from that which I might expect?

What may have been the consequences of this disruption to the order of speakers on the understandings of this consultation?

Do I notice occasions when the patient's voice is lost i.e. words of the patient appear to have gone without translation by the interpreter?

Do I notice occasions when my own words appear to have gone without translation by the interpreter?

What can I do to ensure that the interpreter is working to the mutual benefit of the patient and doctor?

## ACKNOWLEDGMENTS

The authors would like to thank the staff and patients who agreed to take part in the four original research projects from which the data presented in this article are selected. [We would also like to thank our peer reviewers for helpful comments on the manuscript.](#)

## COMPETING INTERESTS

None declared

## FUNDING

The research projects on which this paper is based were funded by: National Institute for Health Research Doctoral Fellowship [and Medical Research Council \(MRC\)](#) (DS); Sir Sigmund Warburg Voluntary Settlement (CR); NHS Bradford & Airedale PhD Fellowship (SL); Swiss National Science Foundation (OW and PS).

## CONTRIBUTORSHIP STATEMENT

[All of the authors of this paper fulfil ICMJE guidelines for authorship. All authors](#) ~~All of the authors of this paper were involved in data collection and analysis. All authors~~ participated in the preparation and presentation of case studies (drawn from their own empirical research) in the research workshops [and in subsequent](#). ~~All authors participated in the~~ re-analysis of case study data to identify emergent cross-cutting themes. ~~DS and CR took responsibility for developing the and in the development of the~~ analysis into practitioner-relevant resources, [refining these in discussion with SL, OW and PS](#). DS wrote the first draft of the paper and revised it in response to

critical commentary from all of the remaining authors (CR, SL, OW, PS). All authors have approved the final version of the manuscript.

### DATA SHARING

There is no additional data available.

Formatted: Font: Bold

Formatted: Font: Not Bold

Formatted: Font: Not Bold

### Reference List

- (1) Peacock JW, Nolan PW. Care under threat in the modern world. *Journal of Advanced Nursing* 2000;32:1066-70.
- (2) Knottnerus JA. The Role of the Electronic Patient Record in the Development of General Practice in the Netherlands. *Methods of Information in Medicine* 1999;38:350-4.
- (3) Protti D, Johansen I. Widespread Adoption of Information Technology in Primary Care Physician Offices in Denmark: A Case Study. Downloadable from [http://www.commonwealthfund.org/~media/Files/Publications/Issue%20Brief/2010/Mar/1379\\_Protti\\_widespread\\_adoption\\_IT\\_primary\\_care\\_Denmark\\_intl\\_ib.pdf](http://www.commonwealthfund.org/~media/Files/Publications/Issue%20Brief/2010/Mar/1379_Protti_widespread_adoption_IT_primary_care_Denmark_intl_ib.pdf). The Commonwealth Fund; 2010.
- (4) RCGP. Information Management and Technology in General Practice: RCGP Information Sheet No.7. 2005.
- (5) Vertovec S. Super-diversity and its implications. *Ethnic and Racial Studies* 2007;30:1024-54.
- (6) Office fédéral de la statistique. Relevé structurel du recensement fédéral de la population selon la langue et la religion. Available from: <http://www.bfs.admin.ch/bfs/portal/fr/index/news/02/03/02.html>. 2013.

- 1
- 2
- 3
- 4
- 5
- 6
- 7 (7) Scott D, Purves I. Triadic relationship between doctor, computer and patient. *Interacting with Computers* 1996;8(4):347-63.
- 8
- 9
- 10 (8) Ventres W, Kooienga S, Marlin R. EHRs in the Exam Room: Tips on Patient-Centred Care. *Family Practice Management* 2006;13(3):45-7.
- 11
- 12 (9) Margalit RS, Roter D, Dunevant MA, Larson S, Reis S. Electronic medical record use and physician-patient communication: An observational study of Israeli primary care encounters. *Patient Education and Counseling* 2006 Apr;61(1):134-41.
- 13
- 14
- 15
- 16 (10) Pearce C. *Doctors, Patients and Computers, the New Consultation*. PhD Thesis Department of General Practice, The University of Melbourne; 2007.
- 17
- 18
- 19 (11) Swinglehurst D, Roberts C, Greenhalgh T. Opening up the "black box" of the electronic patient record: A linguistic ethnographic study in general practice. *Communication and Medicine* 2011;8(1):3-15.
- 20
- 21
- 22 (12) Swinglehurst D, Greenhalgh T, Roberts C. Computer templates in chronic disease management: ethnographic case study in general practice. *BMJ Open* 2012;2:e001754.
- 23
- 24
- 25 (13) Greenhalgh T, Voisey C, Robb N. Interpreted consultations as 'business as usual'? An analysis of organisational routines in general practices. *Sociology of Health and Illness* 2007;29:931-54.
- 26
- 27
- 28
- 29 (14) Li S, Pearson D, Escott S. Language barriers within primary care consultations: an increasing challenge needing new solutions. *Education for Primary Care* 2010;21:385-91.
- 30
- 31
- 32 (15) Hale SB. *Community Interpreting*. Basingstoke: Palgrave Macmillan; 2007.
- 33
- 34 (16) Seale C, Rivas C, Kelly M. The challenge of communication in interpreted consultations in diabetes care: a mixed methods study. *Br J Gen Pract* 2013;DOI: 10.3399/bjgp13X663082.
- 35
- 36 (17) Bischoff A, Loutan L. *Other Words, Other Meanings - a guide to health care interpreting in international settings*. Geneva: Serve de médecine internationale et humanitaire, HUG; 2008.
- 37
- 38
- 39 (18) Guex P, Singy P. *Quand la médecine à besoin d'interprètes*. Genève: Éditions médecine et hygiène; 2003.
- 40
- 41
- 42 (19) Roberts C, Moss B, Wass V, Sarangi S, Jones R. Misunderstandings: a qualitative study of primary care consultations in multilingual settings, and educational implications. *Medical Education* 2005;39:465-75.
- 43
- 44
- 45
- 46 (20) Lown B, Rodriguez D. Lost in Translation? How Electronic Health Records Structure Communication, Relationships, and Meaning. *Academic Medicine* 2012;87:392-4.
- 47
- 48
- 49 (21) Kai J. *Valuing diversity: a resource for health professional training to respond to cultural diversity*. London: Royal College of General Practitioners; 2006.
- 50
- 51 (22) Tebble H. *Medical Interpreting: Improving communication with your patients*. Geelong, Victoria: Deakin University; 1998.
- 52
- 53
- 54
- 55
- 56
- 57
- 58
- 59
- 60

- 1  
2  
3  
4  
5  
6  
7 (23) Lie D, Berekyei S, Braddock C, Encinas J, Ahearn S, Boker J. Assessing Medical Students' Skills in Working with Interpreters During Patient Encounters: A Validation Study of the Interpreter Scale. *Academic Medicine* 2009;84:643-50.
- 8  
9  
10 (24) Booth N, Kohannejad J, Robinson P. Information in the consulting room - training package. Sowerby Centre for Health Informatics at Newcastle; 2002 Jul.
- 11  
12  
13 (25) Mitchell J. Producing data: Case studies. In: Ellen R, editor. *Ethnographic Research: A Guide to General Conduct*. London: Academic Press; 1984. p. 237-41.
- 14  
15  
16 (26) Roberts C, Sarangi S. Theme-oriented discourse analysis of medical encounters. *Medical Education* 2005;39:632-40.
- 17  
18  
19 (27) Heritage J. Goffman, Garfinkel and Conversation Analysis. In: Wetherell M, Taylor S, Yates S, editors. *Discourse Theory and Practice*. London: Sage Publications; 2001. p. 47-56.
- 20  
21 (28) Rampton B, Tusting K, Maybin J, Barwell R, Creese A, Lytra V. UK Linguistic Ethnography: A discussion paper. Downloadable from <http://www.ling-ethnog.org.uk/documents/papers/ramptonetal2004.pdf>. 2004.
- 22  
23  
24 (29) Hammersley M. *What's Wrong with Ethnography?* London: Routledge; 1992.
- 25  
26  
27 (30) Byrne PS, Long BEL. *Doctors Talking to Patients. A Study of the Verbal Behaviour of General Practitioners Consulting in their Surgeries*. London: HMSO; 1976.
- 28  
29  
30 (31) Kurtz S, Silverman J. The Calgary-Cambridge referenced observation guides: an aid to defining the curriculum and organising the teaching in communication training programmes. *Medical Education* 1996;30:83-9.
- 31  
32  
33 (32) Edelsky C. Who's got the floor? *Language and Society* 1981;10(3):383-421.
- 34  
35 (33) Davies P. The crowded consultation. *Br J Gen Pract* 2012;62:648-9.
- 36  
37 (34) Heritage J, Maynard DW. *Communication in Medical Care*. Cambridge: Cambridge University Press; 2006.
- 38  
39 (35) Schegloff EA. Notes on a conversational practice: formulating place. In: Sudnow D, editor. *Studies in Social Interaction*. New York: Free Press; 1972.
- 40  
41  
42 (36) Robinson JD. Getting Down to Business: Talk, Gaze and Body Orientation during Openings of Doctor-Patient Consultations. *Human Communication Research* 1998;25(1):97-123.
- 43  
44 (37) Ruusuvuori J. Looking means listening: coordinating displays of engagement in doctor-patient interaction. *Social Science & Medicine* 2001;52(7):1093-108.
- 45  
46  
47 (38) Goffman E. *Involvement. Behavior in Public Places*. New York: The Free Press; 1966. p. 33-42.
- 48  
49 (39) Atkinson P. Medical discourse, evidentiality and the construction of professional responsibility. In: Sarangi S, Roberts C, editors. *Talk, work and institutional order*. Berlin, New York: Mouton de Gruyter; 1999.
- 50  
51  
52 (40) Gwyn R, Elwyn G. When is a shared decision not (quite) a shared decision? Negotiating preferences in a general practice encounter. *Social Science & Medicine* 1999;49(4):437-47.
- 53  
54  
55  
56  
57  
58  
59  
60

- 1  
2  
3  
4  
5  
6  
7 (41) Roberts C. Continuities and Discontinuities in Doctor-Patient consultations in a multilingual  
8 society. In: Gott M, Salager-Meyer F, editors. *Advances in Medical Discourse Analysis: Oral  
9 and Written Contexts*. Bern: Peter Lang; 2006. p. 177-96.
- 10 (42) Li S. Co-construction of interpreted conversation in medical consultations. *Applied  
11 Linguistics Review* 2013;4:127-49.
- 12  
13 (43) Bolden GB. Toward understanding practices of medical interpreting: interpreters'  
14 involvement in history taking. *Discourse Studies* 2000;2:387-419.
- 15  
16 (44) Stake RE. Qualitative Case Studies. In: Denzin NK, Lincoln YS, editors. *The Sage Handbook of  
17 Qualitative Research*. 3rd ed. Sage Publications, Inc; 2005. p. 443-66.
- 18  
19  
20  
21  
22  
23  
24  
25  
26  
27  
28  
29  
30  
31  
32  
33  
34  
35  
36  
37  
38  
39  
40  
41  
42  
43  
44  
45  
46  
47  
48  
49  
50  
51  
52  
53  
54  
55  
56  
57  
58  
59  
60

Figure 1. New forms of order and the distribution of authorship in the asthma clinic

| Time                                 | N/P | Spoken word                                                                                                                                                              | Bodily conduct / notes on EPR                                                                                  |
|--------------------------------------|-----|--------------------------------------------------------------------------------------------------------------------------------------------------------------------------|----------------------------------------------------------------------------------------------------------------|
| 01:08                                | N   | So really straightforward.<br>(0.4)                                                                                                                                      | N puts paper on desk<br>N rotates body and gaze to face P, her hands on her lap.<br>P looking at N             |
| 01:09                                | N   | Asthma assessment<br>(0.4)                                                                                                                                               |                                                                                                                |
|                                      | P   | Okay                                                                                                                                                                     | P nods                                                                                                         |
| 01:11                                | N   | to see how your asthma's doing:                                                                                                                                          | N raises both hands in front                                                                                   |
| 01:13                                | N   | what you're doing w- with it when<br>it's good, what you do with it<br>when it's bad,<br>(0.2)<br>have you any problems with your<br>↑inhalers<br>(0.4)<br>.hhh<br>(0.5) | N uses fingers to count (on 'good', 'bad', 'problems')<br><br><br><br><br><br>N hands open out in front of her |
| 01:19                                | N   | Very straightforward stuff                                                                                                                                               | N hands to lap                                                                                                 |
|                                      | P   | Okay                                                                                                                                                                     | P nods                                                                                                         |
|                                      | N   | [all right?<br>.hhh                                                                                                                                                      |                                                                                                                |
| <i>{lines of transcript omitted}</i> |     |                                                                                                                                                                          |                                                                                                                |
| 02:46                                | N   | So:: er<br>(( C ))                                                                                                                                                       | N turns to face EPR screen                                                                                     |
| 02:47                                | N   | Ho- you've never smoked.<br>(0.4)                                                                                                                                        | N → EPR ( <i>last entry in template reads 'never smoked'</i> )                                                 |
|                                      | N   | that's what I've got here                                                                                                                                                | N turns head towards P                                                                                         |
|                                      | P   | [no<br>(0.4)<br>[never smoked]                                                                                                                                           | P looking at N                                                                                                 |
| 02:50                                | N   | [never smoked]<br><br>(( C ))<br><br>[Exc] ell [ent]<br>[[ ( C )]] [[ ( C )]]                                                                                            | N turns back to look at EPR. Emphatic keystroke                                                                |
| 02:52                                | N   | [Th] at's gr[.e:at]<br>[[ ( C )]] [[ ( C )]]                                                                                                                             | N looking at screen, typing keystrokes                                                                         |

90x96mm (300 x 300 DPI)

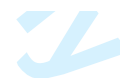

Figure 2. Dis-order arising from different conventions in intonation

|    |    |                                                                   |
|----|----|-------------------------------------------------------------------|
| 1  | GP | what kind of dog was that (.) it was somebody's (.) dog=          |
| 2  | Pt | =yes somebody's                                                   |
| 3  | GP | it was a stray dog                                                |
| 4  | Pt | no no it was somebody's dog                                       |
| 5  | GP | right                                                             |
| 6  | Pt | yes I:: made an enquiry they said that- <b>they *they told me</b> |
| 7  |    | <b>the dog go to the vet regular</b>                              |
| 8  | GP | *right *okay                                                      |
| 9  | Pt | <b>but that's *what they said</b>                                 |
| 10 | GP | right (.) *right right so did you know the owner or did=          |
| 11 | Pt | = I know the owner =                                              |
| 12 | GP | = oh fair enough (.) so                                           |
| 13 | Pt | <b>erm:: ((laughs)) but</b>                                       |
| 14 | GP | did you see any doctor then                                       |
| 15 | Pt | no                                                                |

90x59mm (300 x 300 DPI)



1  
2  
3  
4  
5  
6  
7  
8  
9  
10 **Figure 3. Negotiating consent for a spinal injection**

- 11 103. Dr: because I thought I'd give you an injection today  
12 104. Pt: =no  
13 105. Dr: =yes, give one  
14 106. Pt: =yes  
15 107. Dr: But if you don't want, I won't. I, for me, it's not a problem giving you an injection  
16 108. Pt: =Yeah  
17 109. Dr: =I don't think that it's a big problem for you either  
18 110. Pt: mmh mmh.  
19 111. Dr: but I think that after the other injection, you had a benefit, you felt better after the  
20 injection in October . . . Didn't you?  
21 112. Pt: mmh. ((*mimics express perplexity*))  
22 113. Dr: So that's why I'd like to do it again, if you, if you don't want, no, I won't do it, if you say,  
23 er, you are afraid, you say, er, after you are getting paralyzed or whatever, I won't do it.  
24 114. Pt: mmh . . . well it's me now not think more, not think right . . . not er er . . . er don't know it's  
25 the cause that how is paralyzed, for me speaking?  
26 115. Dr: =you [told me]  
27 116. Pt: [oh but yes]  
28 117. Dr: you told me before  
29 118. Pt: =yeah  
30 119. Dr: =you said, you were afraid of getting paralyzed  
31 120. Pt: =yeah  
32 121. Dr: =so, this happens not often  
33 122. Pt: =and next, the next (1) here keep . . . water. ((*patient indicates non verbally something*  
34 *running down from his forehead to his temples*))  
35 123. Dr: =where?  
36 124. Pt: here, next (1) er injection, it's me, it's the, it's the, the, back pain, me come, immediately  
37 injection ah . . . ah, that's not much pain, after. problem, it's same like war, ah . . . in my  
38 country, war and then, I don't know how to explain well  
39 125. Dr: well, I don't know, if, today, I tell you we give the injection, we're gonna give the  
40 injection, do you agree or not  
41 126. Pt: =yes  
42 127. Dr: =then we'll give it

43  
44  
45  
46  
47  
48  
49  
50  
51  
52  
53  
54  
55  
56  
57  
58  
59  
60

1. In this translation "next" probably means "last" – this was a recurring error of vocabulary throughout the consultation

90x116mm (300 x 300 DPI)

Figure 4 Lost voices in distributed turn-taking sequence organisation (English translation in italics)

1. Dr: =An (.) she says it starts in the afternoon::n (.) every day (0.3) does it last (0.4) until
2. she goes to bed, how long does it last for "in the afternoon"
3. Int: ako dlho to trvá
4. *How long does it last for*
5. Pt: tak je to hodinu, dva, to strašne bolí a potom prestane.
6. *well, it is for an hour, two, it hurts badly and then it stops.*
7. Int: ok, that start afternoon. She feel that pain about for one two hours
8. Dr: one or two h[ours
9. Int: [and after that go away:: "ok"
10. Dr: alright↑. Interesting. That's good.
11. Pt: A ešte by som sa chcela povedať, [že ja nosím oku okuliare.
12. *And I would also like to say that I wear gla glasses.*
13. Dr: [could you (0.59) show me where she feels it?
14. Int: u:hm Môžte ukázať
15. *U:hm Can you show*
16. Pt: [Tu.
17. *Here*

90x61mm (300 x 300 DPI)

## Appendix

### Transcribing conventions

|                       |                                                                                     |       |                                                              |
|-----------------------|-------------------------------------------------------------------------------------|-------|--------------------------------------------------------------|
| [                     | onset of overlapping speech                                                         | .hhh  | in breath                                                    |
| ]                     | end of spate of overlapping talk                                                    | =     | no pause between speakers; contiguous utterances             |
| :                     | preceding sounds is lengthened or drawn out<br>(more :: means greater prolongation) | (( )) | non verbal activity / sounds. C indicates keystroke in Fig 1 |
| <u>Underline</u> or * | emphasis                                                                            | .     | falling tone (not necessarily end of sentence)               |
| (.)                   | pause of less than 0.2 seconds                                                      | ?     | Rising inflection (not necessarily a question)               |
| (0.4)                 | pause, in tenths of second                                                          |       |                                                              |
| ↑↓                    | marked rise /fall in intonation                                                     |       |                                                              |
| ° °                   | The talk they surround is quieter than surrounding talk                             |       |                                                              |
