# Supplementary material for: Beyond the ‘dyad’: a qualitative re-evaluation of the changing clinical consultation
Source: HighWire-hosted journal article supplement (doi:10.1136/bmjopen-2014-006017), 2014-09-01
Supplement: bmjopen-2014-006017supp.pdf [file bmjopen-2014-006017supp.pdf]

## Appendix

### Transcribing conventions

|                       |                                                                                     |       |                                                              |
|-----------------------|-------------------------------------------------------------------------------------|-------|--------------------------------------------------------------|
| [                     | onset of overlapping speech                                                         | .hhh  | in breath                                                    |
| ]                     | end of space of overlapping talk                                                    | =     | no pause between speakers; contiguous utterances             |
| :                     | preceding sounds is lengthened or drawn out<br>(more :: means greater prolongation) | (( )) | non verbal activity / sounds. C indicates keystroke in Fig 1 |
| <u>Underline</u> or * | emphasis                                                                            | .     | falling tone (not necessarily end of sentence)               |
| (.)                   | pause of less than 0.2 seconds                                                      | ?     | Rising inflection (not necessarily a question)               |
| (0.4)                 | pause, in tenths of second                                                          |       |                                                              |
| ↑↓                    | marked rise /fall in intonation                                                     |       |                                                              |
| ° °                   | The talk they surround is quieter than surrounding talk                             |       |                                                              |
